# Supplementary material for: European dog owner perceptions of obesity and factors associated with human and canine obesity
Source: PubMed Central journal article supplement (PMC6127309; doi:10.1038/s41598-018-31532-0), 2018-09-06
Supplement: 41598_2018_31532_MOESM1_ESM.pdf [file 41598_2018_31532_MOESM1_ESM.pdf]

## **European dog-owner perceptions of obesity and factors associated with human and canine obesity**

Alberto Muñoz-Prieto,<sup>1</sup> Liza Rosenbaum Nielsen,<sup>2</sup> Roman Dąbrowski,<sup>3</sup> Charlotte Reinhard Bjørnvad,<sup>4</sup> Josefin Söder,<sup>5</sup> Elsa Lamy,<sup>6</sup> Ingrida Monkeviciene,<sup>7</sup> Blanka Beer Ljubić,<sup>8</sup> Iosif Vasiiu,<sup>9</sup> Sara Savich,<sup>10</sup> Francesca Busato,<sup>11</sup> Zeki Yilmaz,<sup>12</sup> Antonio F. Bravo-Cantero,<sup>13</sup> Malin Öhlund,<sup>14</sup> Sónia Lucena,<sup>6</sup> Rasa Zelvyte,<sup>7</sup> Jasna Aladrovic,<sup>15</sup> Pia Lopez-Jornet,<sup>16</sup> Marco Caldin,<sup>11</sup> Catarina Lavrador,<sup>6</sup> Birute Karveliene,<sup>17</sup> Vladimir Mrljak,<sup>8</sup> Jovita Mazeikiene,<sup>18</sup> Asta Tvariionaviciute.<sup>1</sup>

1. Interlab-UMU, Regional Campus of International Excellence “Mare Nostrum”, University of Murcia, Ed.16, 4a planta, Espinardo, Murcia 30100, Spain.

2. Department of Veterinary and Animal Sciences, Faculty of Health and Medical Sciences, University of Copenhagen, Grønnegårdsvej 8, 1870 Frederiksberg C, Denmark.

3. Department and Clinic of Animal Reproduction, Faculty of Veterinary Medicine, University of Life Sciences, Gleboka 30 St, 20-612 Lublin, Poland.

4. Department of Veterinary Clinical Sciences, Dyr lægevej 16, 1870 Frederiksberg C University of Copenhagen, Denmark.

5. Department of Anatomy, Physiology and Biochemistry, Swedish University of Agricultural Sciences, P.O. Box 7011, SE\_750 07 Uppsala, Sweden.

6. Instituto de Ciências Agrárias e Ambientais Mediterrânicas (ICAAM), Departamento de Medicina Veterinária, Escola de Ciências e Tecnologia, Universidade de Évora, Núcleo da Mitra, Apartado 94, 7006-554 Évora, Portugal.

7. Department of Anatomy and Physiology, Research Center of Digestive Physiology and Pathology, Veterinary Academy, Lithuanian University of Health Sciences, Tilzes 18, LT-47181 Kaunas, Lithuania.

8. Clinic for Internal Diseases, Faculty of Veterinary Medicine, Heinzelova 55, 10000 Zagreb, Croatia.

9. Small Animal Emergency Hospital, University of Agricultural Sciences and Veterinary Medicine Cluj-Napoca, Calea Mănăştur 3-5, 400372, Romania.

10. Scientific Veterinary Institute “NoviSad”, Serbia.

11. San Marco Veterinary Clinic, Padova, Italy.

12. Department of Internal Medicine, Faculty of Veterinary Medicine, Uludag University, 16059, Nilufer, Bursa, Turkey.

13. Estadística Murcia, 30565 Las Torres de Cotillas, Murcia, Spain.

14. Department of Clinical Sciences, Swedish University of Agricultural Sciences, Box 7054, 750 07 Uppsala, Sweden.

15. Department of Physiology and Radiobiology, Faculty of Veterinary Medicine, Heinzelova 55, 10000 Zagreb, Croatia.

16. Department of Oral Medicine, Faculty of Medicine, University of Murcia, 30100 Espinardo, Spain.

17. Veterinary faculty, Dr. L Kriaučeliūnas Small Animal Clinic (teaching hospital), Veterinary Academy, Lithuanian University of Health Sciences, Tilzes 18, LT-47181 Kaunas, Lithuania.

18. InMedica Vilnius - Alfa Clinic, Baltrusaicio 3, 06120 Vilnius, Lithuania.

\* **Correspondence to:** Dr. Asta Tvarijonavičiūtė, Interlab-UMU, Regional Campus of International Excellence “Mare Nostrum”, University of Murcia, Ed.16, 4a planta, Espinardo, Murcia 30100, Spain. Email: [asta@um.es](mailto:asta@um.es) Tel. +34868887168

**Supplementary Information 1.** The final version of the questionnaire used in the study and the comments related to the statistical approach of some of the questions.

## Obesity among pet-owners and pets

**Purpose:** To study the possible causes of obesity and associated diseases among pet owners and their pets.

- All personal data will be protected with guaranteed confidentiality in accordance with Law 15 of 13th December 1999.

| Number           | Question                                                                                                                                                                                                                                                                                                                                                                                                                                                                                      | Comments                               |   |   |   |   |   |   |    |   |    |  |
|------------------|-----------------------------------------------------------------------------------------------------------------------------------------------------------------------------------------------------------------------------------------------------------------------------------------------------------------------------------------------------------------------------------------------------------------------------------------------------------------------------------------------|----------------------------------------|---|---|---|---|---|---|----|---|----|--|
| Informed consent | <input type="checkbox"/> I understand that all data supplied by myself in this questionnaire will only be used for the purposes specified above.                                                                                                                                                                                                                                                                                                                                              |                                        |   |   |   |   |   |   |    |   |    |  |
| 1                | <b>Where did you hear about this study?</b> <ul style="list-style-type: none"> <li>• Through a researcher involved in the study</li> <li>• Through the veterinary clinic I go to with my pet</li> <li>• Through somebody else who went to a veterinary clinic</li> <li>• Through a dog activity or dog breeding organisation</li> <li>• Through a colleague</li> <li>• Through a friend or family member</li> <li>• Through social media (e.g. Facebook, Twitter)</li> <li>• Other</li> </ul> |                                        |   |   |   |   |   |   |    |   |    |  |
| 2                | <b>In what part of the country do you currently live?</b> <ul style="list-style-type: none"> <li>• South</li> <li>• North</li> <li>• Eastern</li> <li>• Western</li> <li>• Central</li> <li>• Do not know</li> </ul>                                                                                                                                                                                                                                                                          |                                        |   |   |   |   |   |   |    |   |    |  |
|                  | <b>Owner data</b><br>Criteria: - If more than one person is taking care of the same pet, the form must be filled in by only one individual                                                                                                                                                                                                                                                                                                                                                    |                                        |   |   |   |   |   |   |    |   |    |  |
| 3                | Age (years)                                                                                                                                                                                                                                                                                                                                                                                                                                                                                   |                                        |   |   |   |   |   |   |    |   |    |  |
| 4                | Gender <ul style="list-style-type: none"> <li>o Man</li> <li>o Woman</li> </ul>                                                                                                                                                                                                                                                                                                                                                                                                               |                                        |   |   |   |   |   |   |    |   |    |  |
| 5                | Height (cm)                                                                                                                                                                                                                                                                                                                                                                                                                                                                                   |                                        |   |   |   |   |   |   |    |   |    |  |
| 6                | Weight (kg)                                                                                                                                                                                                                                                                                                                                                                                                                                                                                   |                                        |   |   |   |   |   |   |    |   |    |  |
| 7                | Number of family members living with pet * <table border="1" style="width: 100%; text-align: center;"> <tr> <td>1</td><td>2</td><td>3</td><td>4</td><td>5</td><td>6</td><td>7</td><td>8</td><td>9</td><td>10</td> </tr> </table>                                                                                                                                                                                                                                                              | 1                                      | 2 | 3 | 4 | 5 | 6 | 7 | 8  | 9 | 10 |  |
| 1                | 2                                                                                                                                                                                                                                                                                                                                                                                                                                                                                             | 3                                      | 4 | 5 | 6 | 7 | 8 | 9 | 10 |   |    |  |
| 8                | Educational level of person responding to questionnaire* <ul style="list-style-type: none"> <li>o Primary</li> </ul>                                                                                                                                                                                                                                                                                                                                                                          | Because of low number of responses for |   |   |   |   |   |   |    |   |    |  |

|                    |                                                                                                                                                                                                                                                                                                                                                                                                                                                                                                                                                                                                                                                                                                                                                                                                                                                                                                                                                                                                                                                                                                                                                                                                                                                                                                                                                                                                                                                                                                                                                                                                                                                                                                                                                                                                                                                                                                                                                                                                                                                                                                                                                                                                                                                                                                                                                                                                                                                                                                                                                                                                                                                                                                                                                                                                                                                                                                                                                                                                                                                                                                                                                                                                                                                                   |                                                                                            |   |                 |   |   |                    |  |  |  |                 |   |   |   |   |   |                    |  |  |  |                 |   |   |   |   |   |                    |  |  |  |                 |   |   |   |   |   |                    |  |  |  |                 |   |   |   |   |   |                    |  |  |  |                 |   |   |   |   |   |                    |  |  |  |                 |   |   |   |   |   |                    |  |  |  |                 |                                                                                                                                                                                                                                                                               |
|--------------------|-------------------------------------------------------------------------------------------------------------------------------------------------------------------------------------------------------------------------------------------------------------------------------------------------------------------------------------------------------------------------------------------------------------------------------------------------------------------------------------------------------------------------------------------------------------------------------------------------------------------------------------------------------------------------------------------------------------------------------------------------------------------------------------------------------------------------------------------------------------------------------------------------------------------------------------------------------------------------------------------------------------------------------------------------------------------------------------------------------------------------------------------------------------------------------------------------------------------------------------------------------------------------------------------------------------------------------------------------------------------------------------------------------------------------------------------------------------------------------------------------------------------------------------------------------------------------------------------------------------------------------------------------------------------------------------------------------------------------------------------------------------------------------------------------------------------------------------------------------------------------------------------------------------------------------------------------------------------------------------------------------------------------------------------------------------------------------------------------------------------------------------------------------------------------------------------------------------------------------------------------------------------------------------------------------------------------------------------------------------------------------------------------------------------------------------------------------------------------------------------------------------------------------------------------------------------------------------------------------------------------------------------------------------------------------------------------------------------------------------------------------------------------------------------------------------------------------------------------------------------------------------------------------------------------------------------------------------------------------------------------------------------------------------------------------------------------------------------------------------------------------------------------------------------------------------------------------------------------------------------------------------------|--------------------------------------------------------------------------------------------|---|-----------------|---|---|--------------------|--|--|--|-----------------|---|---|---|---|---|--------------------|--|--|--|-----------------|---|---|---|---|---|--------------------|--|--|--|-----------------|---|---|---|---|---|--------------------|--|--|--|-----------------|---|---|---|---|---|--------------------|--|--|--|-----------------|---|---|---|---|---|--------------------|--|--|--|-----------------|---|---|---|---|---|--------------------|--|--|--|-----------------|-------------------------------------------------------------------------------------------------------------------------------------------------------------------------------------------------------------------------------------------------------------------------------|
|                    | <ul style="list-style-type: none"> <li>o Secondary/High School</li> <li>o Vocational training</li> <li>o University degree</li> <li>o Postgraduate qualifications</li> <li>o Other</li> </ul>                                                                                                                                                                                                                                                                                                                                                                                                                                                                                                                                                                                                                                                                                                                                                                                                                                                                                                                                                                                                                                                                                                                                                                                                                                                                                                                                                                                                                                                                                                                                                                                                                                                                                                                                                                                                                                                                                                                                                                                                                                                                                                                                                                                                                                                                                                                                                                                                                                                                                                                                                                                                                                                                                                                                                                                                                                                                                                                                                                                                                                                                     | Primary and Secondary education levels, these were fused for further statistical analysis. |   |                 |   |   |                    |  |  |  |                 |   |   |   |   |   |                    |  |  |  |                 |   |   |   |   |   |                    |  |  |  |                 |   |   |   |   |   |                    |  |  |  |                 |   |   |   |   |   |                    |  |  |  |                 |   |   |   |   |   |                    |  |  |  |                 |   |   |   |   |   |                    |  |  |  |                 |                                                                                                                                                                                                                                                                               |
| 9                  | Employment * <ul style="list-style-type: none"> <li>o Student</li> <li>o Employed</li> <li>o Retired</li> <li>o Unemployed</li> </ul>                                                                                                                                                                                                                                                                                                                                                                                                                                                                                                                                                                                                                                                                                                                                                                                                                                                                                                                                                                                                                                                                                                                                                                                                                                                                                                                                                                                                                                                                                                                                                                                                                                                                                                                                                                                                                                                                                                                                                                                                                                                                                                                                                                                                                                                                                                                                                                                                                                                                                                                                                                                                                                                                                                                                                                                                                                                                                                                                                                                                                                                                                                                             |                                                                                            |   |                 |   |   |                    |  |  |  |                 |   |   |   |   |   |                    |  |  |  |                 |   |   |   |   |   |                    |  |  |  |                 |   |   |   |   |   |                    |  |  |  |                 |   |   |   |   |   |                    |  |  |  |                 |   |   |   |   |   |                    |  |  |  |                 |   |   |   |   |   |                    |  |  |  |                 |                                                                                                                                                                                                                                                                               |
| 10                 | Monthly Family income * <ul style="list-style-type: none"> <li>o =&lt; national minimum wage (MW)</li> <li>o 1 – 2 MW</li> <li>o 2 – 3 MW</li> <li>o 3 – 4 MW</li> <li>o =&gt; 4 MW</li> </ul>                                                                                                                                                                                                                                                                                                                                                                                                                                                                                                                                                                                                                                                                                                                                                                                                                                                                                                                                                                                                                                                                                                                                                                                                                                                                                                                                                                                                                                                                                                                                                                                                                                                                                                                                                                                                                                                                                                                                                                                                                                                                                                                                                                                                                                                                                                                                                                                                                                                                                                                                                                                                                                                                                                                                                                                                                                                                                                                                                                                                                                                                    |                                                                                            |   |                 |   |   |                    |  |  |  |                 |   |   |   |   |   |                    |  |  |  |                 |   |   |   |   |   |                    |  |  |  |                 |   |   |   |   |   |                    |  |  |  |                 |   |   |   |   |   |                    |  |  |  |                 |   |   |   |   |   |                    |  |  |  |                 |   |   |   |   |   |                    |  |  |  |                 |                                                                                                                                                                                                                                                                               |
| 11-17              | <p><b>Attitude toward physical activity</b></p> <p>Please respond to the following statements with a score of 1-5 where 1 = total disagreement and 5 = total agreement. Please tick only one box in each row; if it is difficult to choose only one answer, choose the option that reflects your opinion <i>most of the time</i>*</p> <p>Doing sport makes me feel good *</p> <table border="1" style="width: 100%; border-collapse: collapse;"> <tr> <td style="width: 20%;">1</td> <td style="width: 10%;">2</td> <td style="width: 10%;">3</td> <td style="width: 10%;">4</td> <td style="width: 10%;">5</td> </tr> <tr> <td>Total disagreement</td> <td></td> <td></td> <td></td> <td>Total agreement</td> </tr> </table> <p>I like doing one or more of the following activities on a regular basis (at least once a week): walking, running, sports, etc. *</p> <table border="1" style="width: 100%; border-collapse: collapse;"> <tr> <td style="width: 20%;">1</td> <td style="width: 10%;">2</td> <td style="width: 10%;">3</td> <td style="width: 10%;">4</td> <td style="width: 10%;">5</td> </tr> <tr> <td>Total disagreement</td> <td></td> <td></td> <td></td> <td>Total agreement</td> </tr> </table> <p>I get bored doing sports activities</p> <table border="1" style="width: 100%; border-collapse: collapse;"> <tr> <td style="width: 20%;">1</td> <td style="width: 10%;">2</td> <td style="width: 10%;">3</td> <td style="width: 10%;">4</td> <td style="width: 10%;">5</td> </tr> <tr> <td>Total disagreement</td> <td></td> <td></td> <td></td> <td>Total agreement</td> </tr> </table> <p>Physical activity relieves stress</p> <table border="1" style="width: 100%; border-collapse: collapse;"> <tr> <td style="width: 20%;">1</td> <td style="width: 10%;">2</td> <td style="width: 10%;">3</td> <td style="width: 10%;">4</td> <td style="width: 10%;">5</td> </tr> <tr> <td>Total disagreement</td> <td></td> <td></td> <td></td> <td>Total agreement</td> </tr> </table> <p>I do not like physical activity because I feel very tired</p> <table border="1" style="width: 100%; border-collapse: collapse;"> <tr> <td style="width: 20%;">1</td> <td style="width: 10%;">2</td> <td style="width: 10%;">3</td> <td style="width: 10%;">4</td> <td style="width: 10%;">5</td> </tr> <tr> <td>Total disagreement</td> <td></td> <td></td> <td></td> <td>Total agreement</td> </tr> </table> <p>I do not have the self-discipline necessary to do exercise *</p> <table border="1" style="width: 100%; border-collapse: collapse;"> <tr> <td style="width: 20%;">1</td> <td style="width: 10%;">2</td> <td style="width: 10%;">3</td> <td style="width: 10%;">4</td> <td style="width: 10%;">5</td> </tr> <tr> <td>Total disagreement</td> <td></td> <td></td> <td></td> <td>Total agreement</td> </tr> </table> <p>I like physical activity because it is beneficial to health</p> <table border="1" style="width: 100%; border-collapse: collapse;"> <tr> <td style="width: 20%;">1</td> <td style="width: 10%;">2</td> <td style="width: 10%;">3</td> <td style="width: 10%;">4</td> <td style="width: 10%;">5</td> </tr> <tr> <td>Total disagreement</td> <td></td> <td></td> <td></td> <td>Total agreement</td> </tr> </table> | 1                                                                                          | 2 | 3               | 4 | 5 | Total disagreement |  |  |  | Total agreement | 1 | 2 | 3 | 4 | 5 | Total disagreement |  |  |  | Total agreement | 1 | 2 | 3 | 4 | 5 | Total disagreement |  |  |  | Total agreement | 1 | 2 | 3 | 4 | 5 | Total disagreement |  |  |  | Total agreement | 1 | 2 | 3 | 4 | 5 | Total disagreement |  |  |  | Total agreement | 1 | 2 | 3 | 4 | 5 | Total disagreement |  |  |  | Total agreement | 1 | 2 | 3 | 4 | 5 | Total disagreement |  |  |  | Total agreement | The responses for questions 11, 12, 14, 17 were scored from 0 to 1 (1=0, 2=0.25, 3=0.5, 4=0.75, and 5=1) and the responses 13, 15, and 16 were scored from 1 to 0 (1=1, 2=0.75, 3=0.5, 4=0.25, and 5=1). Then the mean score was calculated for further statistical analysis. |
| 1                  | 2                                                                                                                                                                                                                                                                                                                                                                                                                                                                                                                                                                                                                                                                                                                                                                                                                                                                                                                                                                                                                                                                                                                                                                                                                                                                                                                                                                                                                                                                                                                                                                                                                                                                                                                                                                                                                                                                                                                                                                                                                                                                                                                                                                                                                                                                                                                                                                                                                                                                                                                                                                                                                                                                                                                                                                                                                                                                                                                                                                                                                                                                                                                                                                                                                                                                 | 3                                                                                          | 4 | 5               |   |   |                    |  |  |  |                 |   |   |   |   |   |                    |  |  |  |                 |   |   |   |   |   |                    |  |  |  |                 |   |   |   |   |   |                    |  |  |  |                 |   |   |   |   |   |                    |  |  |  |                 |   |   |   |   |   |                    |  |  |  |                 |   |   |   |   |   |                    |  |  |  |                 |                                                                                                                                                                                                                                                                               |
| Total disagreement |                                                                                                                                                                                                                                                                                                                                                                                                                                                                                                                                                                                                                                                                                                                                                                                                                                                                                                                                                                                                                                                                                                                                                                                                                                                                                                                                                                                                                                                                                                                                                                                                                                                                                                                                                                                                                                                                                                                                                                                                                                                                                                                                                                                                                                                                                                                                                                                                                                                                                                                                                                                                                                                                                                                                                                                                                                                                                                                                                                                                                                                                                                                                                                                                                                                                   |                                                                                            |   | Total agreement |   |   |                    |  |  |  |                 |   |   |   |   |   |                    |  |  |  |                 |   |   |   |   |   |                    |  |  |  |                 |   |   |   |   |   |                    |  |  |  |                 |   |   |   |   |   |                    |  |  |  |                 |   |   |   |   |   |                    |  |  |  |                 |   |   |   |   |   |                    |  |  |  |                 |                                                                                                                                                                                                                                                                               |
| 1                  | 2                                                                                                                                                                                                                                                                                                                                                                                                                                                                                                                                                                                                                                                                                                                                                                                                                                                                                                                                                                                                                                                                                                                                                                                                                                                                                                                                                                                                                                                                                                                                                                                                                                                                                                                                                                                                                                                                                                                                                                                                                                                                                                                                                                                                                                                                                                                                                                                                                                                                                                                                                                                                                                                                                                                                                                                                                                                                                                                                                                                                                                                                                                                                                                                                                                                                 | 3                                                                                          | 4 | 5               |   |   |                    |  |  |  |                 |   |   |   |   |   |                    |  |  |  |                 |   |   |   |   |   |                    |  |  |  |                 |   |   |   |   |   |                    |  |  |  |                 |   |   |   |   |   |                    |  |  |  |                 |   |   |   |   |   |                    |  |  |  |                 |   |   |   |   |   |                    |  |  |  |                 |                                                                                                                                                                                                                                                                               |
| Total disagreement |                                                                                                                                                                                                                                                                                                                                                                                                                                                                                                                                                                                                                                                                                                                                                                                                                                                                                                                                                                                                                                                                                                                                                                                                                                                                                                                                                                                                                                                                                                                                                                                                                                                                                                                                                                                                                                                                                                                                                                                                                                                                                                                                                                                                                                                                                                                                                                                                                                                                                                                                                                                                                                                                                                                                                                                                                                                                                                                                                                                                                                                                                                                                                                                                                                                                   |                                                                                            |   | Total agreement |   |   |                    |  |  |  |                 |   |   |   |   |   |                    |  |  |  |                 |   |   |   |   |   |                    |  |  |  |                 |   |   |   |   |   |                    |  |  |  |                 |   |   |   |   |   |                    |  |  |  |                 |   |   |   |   |   |                    |  |  |  |                 |   |   |   |   |   |                    |  |  |  |                 |                                                                                                                                                                                                                                                                               |
| 1                  | 2                                                                                                                                                                                                                                                                                                                                                                                                                                                                                                                                                                                                                                                                                                                                                                                                                                                                                                                                                                                                                                                                                                                                                                                                                                                                                                                                                                                                                                                                                                                                                                                                                                                                                                                                                                                                                                                                                                                                                                                                                                                                                                                                                                                                                                                                                                                                                                                                                                                                                                                                                                                                                                                                                                                                                                                                                                                                                                                                                                                                                                                                                                                                                                                                                                                                 | 3                                                                                          | 4 | 5               |   |   |                    |  |  |  |                 |   |   |   |   |   |                    |  |  |  |                 |   |   |   |   |   |                    |  |  |  |                 |   |   |   |   |   |                    |  |  |  |                 |   |   |   |   |   |                    |  |  |  |                 |   |   |   |   |   |                    |  |  |  |                 |   |   |   |   |   |                    |  |  |  |                 |                                                                                                                                                                                                                                                                               |
| Total disagreement |                                                                                                                                                                                                                                                                                                                                                                                                                                                                                                                                                                                                                                                                                                                                                                                                                                                                                                                                                                                                                                                                                                                                                                                                                                                                                                                                                                                                                                                                                                                                                                                                                                                                                                                                                                                                                                                                                                                                                                                                                                                                                                                                                                                                                                                                                                                                                                                                                                                                                                                                                                                                                                                                                                                                                                                                                                                                                                                                                                                                                                                                                                                                                                                                                                                                   |                                                                                            |   | Total agreement |   |   |                    |  |  |  |                 |   |   |   |   |   |                    |  |  |  |                 |   |   |   |   |   |                    |  |  |  |                 |   |   |   |   |   |                    |  |  |  |                 |   |   |   |   |   |                    |  |  |  |                 |   |   |   |   |   |                    |  |  |  |                 |   |   |   |   |   |                    |  |  |  |                 |                                                                                                                                                                                                                                                                               |
| 1                  | 2                                                                                                                                                                                                                                                                                                                                                                                                                                                                                                                                                                                                                                                                                                                                                                                                                                                                                                                                                                                                                                                                                                                                                                                                                                                                                                                                                                                                                                                                                                                                                                                                                                                                                                                                                                                                                                                                                                                                                                                                                                                                                                                                                                                                                                                                                                                                                                                                                                                                                                                                                                                                                                                                                                                                                                                                                                                                                                                                                                                                                                                                                                                                                                                                                                                                 | 3                                                                                          | 4 | 5               |   |   |                    |  |  |  |                 |   |   |   |   |   |                    |  |  |  |                 |   |   |   |   |   |                    |  |  |  |                 |   |   |   |   |   |                    |  |  |  |                 |   |   |   |   |   |                    |  |  |  |                 |   |   |   |   |   |                    |  |  |  |                 |   |   |   |   |   |                    |  |  |  |                 |                                                                                                                                                                                                                                                                               |
| Total disagreement |                                                                                                                                                                                                                                                                                                                                                                                                                                                                                                                                                                                                                                                                                                                                                                                                                                                                                                                                                                                                                                                                                                                                                                                                                                                                                                                                                                                                                                                                                                                                                                                                                                                                                                                                                                                                                                                                                                                                                                                                                                                                                                                                                                                                                                                                                                                                                                                                                                                                                                                                                                                                                                                                                                                                                                                                                                                                                                                                                                                                                                                                                                                                                                                                                                                                   |                                                                                            |   | Total agreement |   |   |                    |  |  |  |                 |   |   |   |   |   |                    |  |  |  |                 |   |   |   |   |   |                    |  |  |  |                 |   |   |   |   |   |                    |  |  |  |                 |   |   |   |   |   |                    |  |  |  |                 |   |   |   |   |   |                    |  |  |  |                 |   |   |   |   |   |                    |  |  |  |                 |                                                                                                                                                                                                                                                                               |
| 1                  | 2                                                                                                                                                                                                                                                                                                                                                                                                                                                                                                                                                                                                                                                                                                                                                                                                                                                                                                                                                                                                                                                                                                                                                                                                                                                                                                                                                                                                                                                                                                                                                                                                                                                                                                                                                                                                                                                                                                                                                                                                                                                                                                                                                                                                                                                                                                                                                                                                                                                                                                                                                                                                                                                                                                                                                                                                                                                                                                                                                                                                                                                                                                                                                                                                                                                                 | 3                                                                                          | 4 | 5               |   |   |                    |  |  |  |                 |   |   |   |   |   |                    |  |  |  |                 |   |   |   |   |   |                    |  |  |  |                 |   |   |   |   |   |                    |  |  |  |                 |   |   |   |   |   |                    |  |  |  |                 |   |   |   |   |   |                    |  |  |  |                 |   |   |   |   |   |                    |  |  |  |                 |                                                                                                                                                                                                                                                                               |
| Total disagreement |                                                                                                                                                                                                                                                                                                                                                                                                                                                                                                                                                                                                                                                                                                                                                                                                                                                                                                                                                                                                                                                                                                                                                                                                                                                                                                                                                                                                                                                                                                                                                                                                                                                                                                                                                                                                                                                                                                                                                                                                                                                                                                                                                                                                                                                                                                                                                                                                                                                                                                                                                                                                                                                                                                                                                                                                                                                                                                                                                                                                                                                                                                                                                                                                                                                                   |                                                                                            |   | Total agreement |   |   |                    |  |  |  |                 |   |   |   |   |   |                    |  |  |  |                 |   |   |   |   |   |                    |  |  |  |                 |   |   |   |   |   |                    |  |  |  |                 |   |   |   |   |   |                    |  |  |  |                 |   |   |   |   |   |                    |  |  |  |                 |   |   |   |   |   |                    |  |  |  |                 |                                                                                                                                                                                                                                                                               |
| 1                  | 2                                                                                                                                                                                                                                                                                                                                                                                                                                                                                                                                                                                                                                                                                                                                                                                                                                                                                                                                                                                                                                                                                                                                                                                                                                                                                                                                                                                                                                                                                                                                                                                                                                                                                                                                                                                                                                                                                                                                                                                                                                                                                                                                                                                                                                                                                                                                                                                                                                                                                                                                                                                                                                                                                                                                                                                                                                                                                                                                                                                                                                                                                                                                                                                                                                                                 | 3                                                                                          | 4 | 5               |   |   |                    |  |  |  |                 |   |   |   |   |   |                    |  |  |  |                 |   |   |   |   |   |                    |  |  |  |                 |   |   |   |   |   |                    |  |  |  |                 |   |   |   |   |   |                    |  |  |  |                 |   |   |   |   |   |                    |  |  |  |                 |   |   |   |   |   |                    |  |  |  |                 |                                                                                                                                                                                                                                                                               |
| Total disagreement |                                                                                                                                                                                                                                                                                                                                                                                                                                                                                                                                                                                                                                                                                                                                                                                                                                                                                                                                                                                                                                                                                                                                                                                                                                                                                                                                                                                                                                                                                                                                                                                                                                                                                                                                                                                                                                                                                                                                                                                                                                                                                                                                                                                                                                                                                                                                                                                                                                                                                                                                                                                                                                                                                                                                                                                                                                                                                                                                                                                                                                                                                                                                                                                                                                                                   |                                                                                            |   | Total agreement |   |   |                    |  |  |  |                 |   |   |   |   |   |                    |  |  |  |                 |   |   |   |   |   |                    |  |  |  |                 |   |   |   |   |   |                    |  |  |  |                 |   |   |   |   |   |                    |  |  |  |                 |   |   |   |   |   |                    |  |  |  |                 |   |   |   |   |   |                    |  |  |  |                 |                                                                                                                                                                                                                                                                               |
| 1                  | 2                                                                                                                                                                                                                                                                                                                                                                                                                                                                                                                                                                                                                                                                                                                                                                                                                                                                                                                                                                                                                                                                                                                                                                                                                                                                                                                                                                                                                                                                                                                                                                                                                                                                                                                                                                                                                                                                                                                                                                                                                                                                                                                                                                                                                                                                                                                                                                                                                                                                                                                                                                                                                                                                                                                                                                                                                                                                                                                                                                                                                                                                                                                                                                                                                                                                 | 3                                                                                          | 4 | 5               |   |   |                    |  |  |  |                 |   |   |   |   |   |                    |  |  |  |                 |   |   |   |   |   |                    |  |  |  |                 |   |   |   |   |   |                    |  |  |  |                 |   |   |   |   |   |                    |  |  |  |                 |   |   |   |   |   |                    |  |  |  |                 |   |   |   |   |   |                    |  |  |  |                 |                                                                                                                                                                                                                                                                               |
| Total disagreement |                                                                                                                                                                                                                                                                                                                                                                                                                                                                                                                                                                                                                                                                                                                                                                                                                                                                                                                                                                                                                                                                                                                                                                                                                                                                                                                                                                                                                                                                                                                                                                                                                                                                                                                                                                                                                                                                                                                                                                                                                                                                                                                                                                                                                                                                                                                                                                                                                                                                                                                                                                                                                                                                                                                                                                                                                                                                                                                                                                                                                                                                                                                                                                                                                                                                   |                                                                                            |   | Total agreement |   |   |                    |  |  |  |                 |   |   |   |   |   |                    |  |  |  |                 |   |   |   |   |   |                    |  |  |  |                 |   |   |   |   |   |                    |  |  |  |                 |   |   |   |   |   |                    |  |  |  |                 |   |   |   |   |   |                    |  |  |  |                 |   |   |   |   |   |                    |  |  |  |                 |                                                                                                                                                                                                                                                                               |
| 18                 | During the past 30 days (1 month) on how many days did you                                                                                                                                                                                                                                                                                                                                                                                                                                                                                                                                                                                                                                                                                                                                                                                                                                                                                                                                                                                                                                                                                                                                                                                                                                                                                                                                                                                                                                                                                                                                                                                                                                                                                                                                                                                                                                                                                                                                                                                                                                                                                                                                                                                                                                                                                                                                                                                                                                                                                                                                                                                                                                                                                                                                                                                                                                                                                                                                                                                                                                                                                                                                                                                                        | For statistical analysis,                                                                  |   |                 |   |   |                    |  |  |  |                 |   |   |   |   |   |                    |  |  |  |                 |   |   |   |   |   |                    |  |  |  |                 |   |   |   |   |   |                    |  |  |  |                 |   |   |   |   |   |                    |  |  |  |                 |   |   |   |   |   |                    |  |  |  |                 |   |   |   |   |   |                    |  |  |  |                 |                                                                                                                                                                                                                                                                               |

|                    |                                                                                                                                                                                                                                                                                                                                                                                                                                                                                                                                                                                                                                                                                                                                                                                                                                                                                                                                                                                                                                                                                                                                                                                                                                                                                                                                                                                                                                                                                                                                                                                                                                                                                                                                                                                                                                                                                                                                                                                                                                                                                                                                                                                                                                                                                                                                                                                                                                                                                                                                                                                                                                                                                                                                                                                                                                                                                                                                                                                                                                                                                                                                                                                                                                                                                                                                                                                                                                                                                                                                                                                                                                                                                                           |                                                                                |   |                 |   |   |                    |  |  |  |                 |   |   |   |   |   |                    |  |  |  |                 |   |   |   |   |   |                    |  |  |  |                 |   |   |   |   |   |                    |  |  |  |                 |   |   |   |   |   |                    |  |  |  |                 |   |   |   |   |   |                    |  |  |  |                 |   |   |   |   |   |                    |  |  |  |                 |   |   |   |   |   |                    |  |  |  |                 |                                                                                                                                                                                                                                                                             |
|--------------------|-----------------------------------------------------------------------------------------------------------------------------------------------------------------------------------------------------------------------------------------------------------------------------------------------------------------------------------------------------------------------------------------------------------------------------------------------------------------------------------------------------------------------------------------------------------------------------------------------------------------------------------------------------------------------------------------------------------------------------------------------------------------------------------------------------------------------------------------------------------------------------------------------------------------------------------------------------------------------------------------------------------------------------------------------------------------------------------------------------------------------------------------------------------------------------------------------------------------------------------------------------------------------------------------------------------------------------------------------------------------------------------------------------------------------------------------------------------------------------------------------------------------------------------------------------------------------------------------------------------------------------------------------------------------------------------------------------------------------------------------------------------------------------------------------------------------------------------------------------------------------------------------------------------------------------------------------------------------------------------------------------------------------------------------------------------------------------------------------------------------------------------------------------------------------------------------------------------------------------------------------------------------------------------------------------------------------------------------------------------------------------------------------------------------------------------------------------------------------------------------------------------------------------------------------------------------------------------------------------------------------------------------------------------------------------------------------------------------------------------------------------------------------------------------------------------------------------------------------------------------------------------------------------------------------------------------------------------------------------------------------------------------------------------------------------------------------------------------------------------------------------------------------------------------------------------------------------------------------------------------------------------------------------------------------------------------------------------------------------------------------------------------------------------------------------------------------------------------------------------------------------------------------------------------------------------------------------------------------------------------------------------------------------------------------------------------------------------|--------------------------------------------------------------------------------|---|-----------------|---|---|--------------------|--|--|--|-----------------|---|---|---|---|---|--------------------|--|--|--|-----------------|---|---|---|---|---|--------------------|--|--|--|-----------------|---|---|---|---|---|--------------------|--|--|--|-----------------|---|---|---|---|---|--------------------|--|--|--|-----------------|---|---|---|---|---|--------------------|--|--|--|-----------------|---|---|---|---|---|--------------------|--|--|--|-----------------|---|---|---|---|---|--------------------|--|--|--|-----------------|-----------------------------------------------------------------------------------------------------------------------------------------------------------------------------------------------------------------------------------------------------------------------------|
|                    | smoke? <ul style="list-style-type: none"> <li><input type="radio"/> Every day or almost every day</li> <li><input type="radio"/> Some days</li> <li><input type="radio"/> Not smoker</li> </ul>                                                                                                                                                                                                                                                                                                                                                                                                                                                                                                                                                                                                                                                                                                                                                                                                                                                                                                                                                                                                                                                                                                                                                                                                                                                                                                                                                                                                                                                                                                                                                                                                                                                                                                                                                                                                                                                                                                                                                                                                                                                                                                                                                                                                                                                                                                                                                                                                                                                                                                                                                                                                                                                                                                                                                                                                                                                                                                                                                                                                                                                                                                                                                                                                                                                                                                                                                                                                                                                                                                           | responses to<br>“Every day or almost every day” and<br>“some days” were fused. |   |                 |   |   |                    |  |  |  |                 |   |   |   |   |   |                    |  |  |  |                 |   |   |   |   |   |                    |  |  |  |                 |   |   |   |   |   |                    |  |  |  |                 |   |   |   |   |   |                    |  |  |  |                 |   |   |   |   |   |                    |  |  |  |                 |   |   |   |   |   |                    |  |  |  |                 |   |   |   |   |   |                    |  |  |  |                 |                                                                                                                                                                                                                                                                             |
| 19                 | Do you suffer from any disease * <ul style="list-style-type: none"> <li><input type="radio"/> No</li> <li><input type="radio"/> Yes</li> </ul>                                                                                                                                                                                                                                                                                                                                                                                                                                                                                                                                                                                                                                                                                                                                                                                                                                                                                                                                                                                                                                                                                                                                                                                                                                                                                                                                                                                                                                                                                                                                                                                                                                                                                                                                                                                                                                                                                                                                                                                                                                                                                                                                                                                                                                                                                                                                                                                                                                                                                                                                                                                                                                                                                                                                                                                                                                                                                                                                                                                                                                                                                                                                                                                                                                                                                                                                                                                                                                                                                                                                                            |                                                                                |   |                 |   |   |                    |  |  |  |                 |   |   |   |   |   |                    |  |  |  |                 |   |   |   |   |   |                    |  |  |  |                 |   |   |   |   |   |                    |  |  |  |                 |   |   |   |   |   |                    |  |  |  |                 |   |   |   |   |   |                    |  |  |  |                 |   |   |   |   |   |                    |  |  |  |                 |   |   |   |   |   |                    |  |  |  |                 |                                                                                                                                                                                                                                                                             |
| 20                 | Which disease(s) do you suffer from?                                                                                                                                                                                                                                                                                                                                                                                                                                                                                                                                                                                                                                                                                                                                                                                                                                                                                                                                                                                                                                                                                                                                                                                                                                                                                                                                                                                                                                                                                                                                                                                                                                                                                                                                                                                                                                                                                                                                                                                                                                                                                                                                                                                                                                                                                                                                                                                                                                                                                                                                                                                                                                                                                                                                                                                                                                                                                                                                                                                                                                                                                                                                                                                                                                                                                                                                                                                                                                                                                                                                                                                                                                                                      |                                                                                |   |                 |   |   |                    |  |  |  |                 |   |   |   |   |   |                    |  |  |  |                 |   |   |   |   |   |                    |  |  |  |                 |   |   |   |   |   |                    |  |  |  |                 |   |   |   |   |   |                    |  |  |  |                 |   |   |   |   |   |                    |  |  |  |                 |   |   |   |   |   |                    |  |  |  |                 |   |   |   |   |   |                    |  |  |  |                 |                                                                                                                                                                                                                                                                             |
| 21                 | Are you receiving chronic treatment (> 1 month duration)? <ul style="list-style-type: none"> <li><input type="radio"/> Yes</li> <li><input type="radio"/> No</li> </ul>                                                                                                                                                                                                                                                                                                                                                                                                                                                                                                                                                                                                                                                                                                                                                                                                                                                                                                                                                                                                                                                                                                                                                                                                                                                                                                                                                                                                                                                                                                                                                                                                                                                                                                                                                                                                                                                                                                                                                                                                                                                                                                                                                                                                                                                                                                                                                                                                                                                                                                                                                                                                                                                                                                                                                                                                                                                                                                                                                                                                                                                                                                                                                                                                                                                                                                                                                                                                                                                                                                                                   |                                                                                |   |                 |   |   |                    |  |  |  |                 |   |   |   |   |   |                    |  |  |  |                 |   |   |   |   |   |                    |  |  |  |                 |   |   |   |   |   |                    |  |  |  |                 |   |   |   |   |   |                    |  |  |  |                 |   |   |   |   |   |                    |  |  |  |                 |   |   |   |   |   |                    |  |  |  |                 |   |   |   |   |   |                    |  |  |  |                 |                                                                                                                                                                                                                                                                             |
| 22                 | What treatment(s) do you receive?                                                                                                                                                                                                                                                                                                                                                                                                                                                                                                                                                                                                                                                                                                                                                                                                                                                                                                                                                                                                                                                                                                                                                                                                                                                                                                                                                                                                                                                                                                                                                                                                                                                                                                                                                                                                                                                                                                                                                                                                                                                                                                                                                                                                                                                                                                                                                                                                                                                                                                                                                                                                                                                                                                                                                                                                                                                                                                                                                                                                                                                                                                                                                                                                                                                                                                                                                                                                                                                                                                                                                                                                                                                                         |                                                                                |   |                 |   |   |                    |  |  |  |                 |   |   |   |   |   |                    |  |  |  |                 |   |   |   |   |   |                    |  |  |  |                 |   |   |   |   |   |                    |  |  |  |                 |   |   |   |   |   |                    |  |  |  |                 |   |   |   |   |   |                    |  |  |  |                 |   |   |   |   |   |                    |  |  |  |                 |   |   |   |   |   |                    |  |  |  |                 |                                                                                                                                                                                                                                                                             |
| 23-32              | <p><b>Attitude towards diet</b></p> <p>Please respond to the following statements with a score of 1-5 where 1 = total disagreement and 5 = total agreement. Please tick only one box in each row; if it is difficult to choose only one answer, choose the option that reflects your opinion <i>most of the time</i>*</p> <p>I believe eating a healthy diet is important for my overall health</p> <table border="1" style="width: 100%; border-collapse: collapse;"> <tr> <td style="width: 20%;">1</td> <td style="width: 10%;">2</td> <td style="width: 10%;">3</td> <td style="width: 10%;">4</td> <td style="width: 10%;">5</td> </tr> <tr> <td>Total disagreement</td> <td></td> <td></td> <td></td> <td>Total agreement</td> </tr> </table> <p>Home-made food is better than fast-food or ready-prepared food</p> <table border="1" style="width: 100%; border-collapse: collapse;"> <tr> <td style="width: 20%;">1</td> <td style="width: 10%;">2</td> <td style="width: 10%;">3</td> <td style="width: 10%;">4</td> <td style="width: 10%;">5</td> </tr> <tr> <td>Total disagreement</td> <td></td> <td></td> <td></td> <td>Total agreement</td> </tr> </table> <p>I feel better eating a healthy diet</p> <table border="1" style="width: 100%; border-collapse: collapse;"> <tr> <td style="width: 20%;">1</td> <td style="width: 10%;">2</td> <td style="width: 10%;">3</td> <td style="width: 10%;">4</td> <td style="width: 10%;">5</td> </tr> <tr> <td>Total disagreement</td> <td></td> <td></td> <td></td> <td>Total agreement</td> </tr> </table> <p>Healthy food is boring</p> <table border="1" style="width: 100%; border-collapse: collapse;"> <tr> <td style="width: 20%;">1</td> <td style="width: 10%;">2</td> <td style="width: 10%;">3</td> <td style="width: 10%;">4</td> <td style="width: 10%;">5</td> </tr> <tr> <td>Total disagreement</td> <td></td> <td></td> <td></td> <td>Total agreement</td> </tr> </table> <p>Healthy meals are laborious (more difficult to shop for, prepare, transport, etc.)</p> <table border="1" style="width: 100%; border-collapse: collapse;"> <tr> <td style="width: 20%;">1</td> <td style="width: 10%;">2</td> <td style="width: 10%;">3</td> <td style="width: 10%;">4</td> <td style="width: 10%;">5</td> </tr> <tr> <td>Total disagreement</td> <td></td> <td></td> <td></td> <td>Total agreement</td> </tr> </table> <p>It is normal to skip breakfast</p> <table border="1" style="width: 100%; border-collapse: collapse;"> <tr> <td style="width: 20%;">1</td> <td style="width: 10%;">2</td> <td style="width: 10%;">3</td> <td style="width: 10%;">4</td> <td style="width: 10%;">5</td> </tr> <tr> <td>Total disagreement</td> <td></td> <td></td> <td></td> <td>Total agreement</td> </tr> </table> <p>How food tastes is more important than its health benefit</p> <table border="1" style="width: 100%; border-collapse: collapse;"> <tr> <td style="width: 20%;">1</td> <td style="width: 10%;">2</td> <td style="width: 10%;">3</td> <td style="width: 10%;">4</td> <td style="width: 10%;">5</td> </tr> <tr> <td>Total disagreement</td> <td></td> <td></td> <td></td> <td>Total agreement</td> </tr> </table> <p>I do not have the self-discipline to follow a healthy diet</p> <table border="1" style="width: 100%; border-collapse: collapse;"> <tr> <td style="width: 20%;">1</td> <td style="width: 10%;">2</td> <td style="width: 10%;">3</td> <td style="width: 10%;">4</td> <td style="width: 10%;">5</td> </tr> <tr> <td>Total disagreement</td> <td></td> <td></td> <td></td> <td>Total agreement</td> </tr> </table> <p>A healthy diet includes a variety of foods (cereals, vegetables, meat, etc.)</p> | 1                                                                              | 2 | 3               | 4 | 5 | Total disagreement |  |  |  | Total agreement | 1 | 2 | 3 | 4 | 5 | Total disagreement |  |  |  | Total agreement | 1 | 2 | 3 | 4 | 5 | Total disagreement |  |  |  | Total agreement | 1 | 2 | 3 | 4 | 5 | Total disagreement |  |  |  | Total agreement | 1 | 2 | 3 | 4 | 5 | Total disagreement |  |  |  | Total agreement | 1 | 2 | 3 | 4 | 5 | Total disagreement |  |  |  | Total agreement | 1 | 2 | 3 | 4 | 5 | Total disagreement |  |  |  | Total agreement | 1 | 2 | 3 | 4 | 5 | Total disagreement |  |  |  | Total agreement | <p>The responses for questions 23, 24, 25, 32 were scored from 0 to 1 (1=0, 2=0.25, 3=0.5, 4=0.75, and 5=1) and for questions 26-31 were scored from 1 to 0 (1=1, 2=0.75, 3=0.5, 4=0.25, and 5=1). Then the mean score was calculated for further statistical analysis.</p> |
| 1                  | 2                                                                                                                                                                                                                                                                                                                                                                                                                                                                                                                                                                                                                                                                                                                                                                                                                                                                                                                                                                                                                                                                                                                                                                                                                                                                                                                                                                                                                                                                                                                                                                                                                                                                                                                                                                                                                                                                                                                                                                                                                                                                                                                                                                                                                                                                                                                                                                                                                                                                                                                                                                                                                                                                                                                                                                                                                                                                                                                                                                                                                                                                                                                                                                                                                                                                                                                                                                                                                                                                                                                                                                                                                                                                                                         | 3                                                                              | 4 | 5               |   |   |                    |  |  |  |                 |   |   |   |   |   |                    |  |  |  |                 |   |   |   |   |   |                    |  |  |  |                 |   |   |   |   |   |                    |  |  |  |                 |   |   |   |   |   |                    |  |  |  |                 |   |   |   |   |   |                    |  |  |  |                 |   |   |   |   |   |                    |  |  |  |                 |   |   |   |   |   |                    |  |  |  |                 |                                                                                                                                                                                                                                                                             |
| Total disagreement |                                                                                                                                                                                                                                                                                                                                                                                                                                                                                                                                                                                                                                                                                                                                                                                                                                                                                                                                                                                                                                                                                                                                                                                                                                                                                                                                                                                                                                                                                                                                                                                                                                                                                                                                                                                                                                                                                                                                                                                                                                                                                                                                                                                                                                                                                                                                                                                                                                                                                                                                                                                                                                                                                                                                                                                                                                                                                                                                                                                                                                                                                                                                                                                                                                                                                                                                                                                                                                                                                                                                                                                                                                                                                                           |                                                                                |   | Total agreement |   |   |                    |  |  |  |                 |   |   |   |   |   |                    |  |  |  |                 |   |   |   |   |   |                    |  |  |  |                 |   |   |   |   |   |                    |  |  |  |                 |   |   |   |   |   |                    |  |  |  |                 |   |   |   |   |   |                    |  |  |  |                 |   |   |   |   |   |                    |  |  |  |                 |   |   |   |   |   |                    |  |  |  |                 |                                                                                                                                                                                                                                                                             |
| 1                  | 2                                                                                                                                                                                                                                                                                                                                                                                                                                                                                                                                                                                                                                                                                                                                                                                                                                                                                                                                                                                                                                                                                                                                                                                                                                                                                                                                                                                                                                                                                                                                                                                                                                                                                                                                                                                                                                                                                                                                                                                                                                                                                                                                                                                                                                                                                                                                                                                                                                                                                                                                                                                                                                                                                                                                                                                                                                                                                                                                                                                                                                                                                                                                                                                                                                                                                                                                                                                                                                                                                                                                                                                                                                                                                                         | 3                                                                              | 4 | 5               |   |   |                    |  |  |  |                 |   |   |   |   |   |                    |  |  |  |                 |   |   |   |   |   |                    |  |  |  |                 |   |   |   |   |   |                    |  |  |  |                 |   |   |   |   |   |                    |  |  |  |                 |   |   |   |   |   |                    |  |  |  |                 |   |   |   |   |   |                    |  |  |  |                 |   |   |   |   |   |                    |  |  |  |                 |                                                                                                                                                                                                                                                                             |
| Total disagreement |                                                                                                                                                                                                                                                                                                                                                                                                                                                                                                                                                                                                                                                                                                                                                                                                                                                                                                                                                                                                                                                                                                                                                                                                                                                                                                                                                                                                                                                                                                                                                                                                                                                                                                                                                                                                                                                                                                                                                                                                                                                                                                                                                                                                                                                                                                                                                                                                                                                                                                                                                                                                                                                                                                                                                                                                                                                                                                                                                                                                                                                                                                                                                                                                                                                                                                                                                                                                                                                                                                                                                                                                                                                                                                           |                                                                                |   | Total agreement |   |   |                    |  |  |  |                 |   |   |   |   |   |                    |  |  |  |                 |   |   |   |   |   |                    |  |  |  |                 |   |   |   |   |   |                    |  |  |  |                 |   |   |   |   |   |                    |  |  |  |                 |   |   |   |   |   |                    |  |  |  |                 |   |   |   |   |   |                    |  |  |  |                 |   |   |   |   |   |                    |  |  |  |                 |                                                                                                                                                                                                                                                                             |
| 1                  | 2                                                                                                                                                                                                                                                                                                                                                                                                                                                                                                                                                                                                                                                                                                                                                                                                                                                                                                                                                                                                                                                                                                                                                                                                                                                                                                                                                                                                                                                                                                                                                                                                                                                                                                                                                                                                                                                                                                                                                                                                                                                                                                                                                                                                                                                                                                                                                                                                                                                                                                                                                                                                                                                                                                                                                                                                                                                                                                                                                                                                                                                                                                                                                                                                                                                                                                                                                                                                                                                                                                                                                                                                                                                                                                         | 3                                                                              | 4 | 5               |   |   |                    |  |  |  |                 |   |   |   |   |   |                    |  |  |  |                 |   |   |   |   |   |                    |  |  |  |                 |   |   |   |   |   |                    |  |  |  |                 |   |   |   |   |   |                    |  |  |  |                 |   |   |   |   |   |                    |  |  |  |                 |   |   |   |   |   |                    |  |  |  |                 |   |   |   |   |   |                    |  |  |  |                 |                                                                                                                                                                                                                                                                             |
| Total disagreement |                                                                                                                                                                                                                                                                                                                                                                                                                                                                                                                                                                                                                                                                                                                                                                                                                                                                                                                                                                                                                                                                                                                                                                                                                                                                                                                                                                                                                                                                                                                                                                                                                                                                                                                                                                                                                                                                                                                                                                                                                                                                                                                                                                                                                                                                                                                                                                                                                                                                                                                                                                                                                                                                                                                                                                                                                                                                                                                                                                                                                                                                                                                                                                                                                                                                                                                                                                                                                                                                                                                                                                                                                                                                                                           |                                                                                |   | Total agreement |   |   |                    |  |  |  |                 |   |   |   |   |   |                    |  |  |  |                 |   |   |   |   |   |                    |  |  |  |                 |   |   |   |   |   |                    |  |  |  |                 |   |   |   |   |   |                    |  |  |  |                 |   |   |   |   |   |                    |  |  |  |                 |   |   |   |   |   |                    |  |  |  |                 |   |   |   |   |   |                    |  |  |  |                 |                                                                                                                                                                                                                                                                             |
| 1                  | 2                                                                                                                                                                                                                                                                                                                                                                                                                                                                                                                                                                                                                                                                                                                                                                                                                                                                                                                                                                                                                                                                                                                                                                                                                                                                                                                                                                                                                                                                                                                                                                                                                                                                                                                                                                                                                                                                                                                                                                                                                                                                                                                                                                                                                                                                                                                                                                                                                                                                                                                                                                                                                                                                                                                                                                                                                                                                                                                                                                                                                                                                                                                                                                                                                                                                                                                                                                                                                                                                                                                                                                                                                                                                                                         | 3                                                                              | 4 | 5               |   |   |                    |  |  |  |                 |   |   |   |   |   |                    |  |  |  |                 |   |   |   |   |   |                    |  |  |  |                 |   |   |   |   |   |                    |  |  |  |                 |   |   |   |   |   |                    |  |  |  |                 |   |   |   |   |   |                    |  |  |  |                 |   |   |   |   |   |                    |  |  |  |                 |   |   |   |   |   |                    |  |  |  |                 |                                                                                                                                                                                                                                                                             |
| Total disagreement |                                                                                                                                                                                                                                                                                                                                                                                                                                                                                                                                                                                                                                                                                                                                                                                                                                                                                                                                                                                                                                                                                                                                                                                                                                                                                                                                                                                                                                                                                                                                                                                                                                                                                                                                                                                                                                                                                                                                                                                                                                                                                                                                                                                                                                                                                                                                                                                                                                                                                                                                                                                                                                                                                                                                                                                                                                                                                                                                                                                                                                                                                                                                                                                                                                                                                                                                                                                                                                                                                                                                                                                                                                                                                                           |                                                                                |   | Total agreement |   |   |                    |  |  |  |                 |   |   |   |   |   |                    |  |  |  |                 |   |   |   |   |   |                    |  |  |  |                 |   |   |   |   |   |                    |  |  |  |                 |   |   |   |   |   |                    |  |  |  |                 |   |   |   |   |   |                    |  |  |  |                 |   |   |   |   |   |                    |  |  |  |                 |   |   |   |   |   |                    |  |  |  |                 |                                                                                                                                                                                                                                                                             |
| 1                  | 2                                                                                                                                                                                                                                                                                                                                                                                                                                                                                                                                                                                                                                                                                                                                                                                                                                                                                                                                                                                                                                                                                                                                                                                                                                                                                                                                                                                                                                                                                                                                                                                                                                                                                                                                                                                                                                                                                                                                                                                                                                                                                                                                                                                                                                                                                                                                                                                                                                                                                                                                                                                                                                                                                                                                                                                                                                                                                                                                                                                                                                                                                                                                                                                                                                                                                                                                                                                                                                                                                                                                                                                                                                                                                                         | 3                                                                              | 4 | 5               |   |   |                    |  |  |  |                 |   |   |   |   |   |                    |  |  |  |                 |   |   |   |   |   |                    |  |  |  |                 |   |   |   |   |   |                    |  |  |  |                 |   |   |   |   |   |                    |  |  |  |                 |   |   |   |   |   |                    |  |  |  |                 |   |   |   |   |   |                    |  |  |  |                 |   |   |   |   |   |                    |  |  |  |                 |                                                                                                                                                                                                                                                                             |
| Total disagreement |                                                                                                                                                                                                                                                                                                                                                                                                                                                                                                                                                                                                                                                                                                                                                                                                                                                                                                                                                                                                                                                                                                                                                                                                                                                                                                                                                                                                                                                                                                                                                                                                                                                                                                                                                                                                                                                                                                                                                                                                                                                                                                                                                                                                                                                                                                                                                                                                                                                                                                                                                                                                                                                                                                                                                                                                                                                                                                                                                                                                                                                                                                                                                                                                                                                                                                                                                                                                                                                                                                                                                                                                                                                                                                           |                                                                                |   | Total agreement |   |   |                    |  |  |  |                 |   |   |   |   |   |                    |  |  |  |                 |   |   |   |   |   |                    |  |  |  |                 |   |   |   |   |   |                    |  |  |  |                 |   |   |   |   |   |                    |  |  |  |                 |   |   |   |   |   |                    |  |  |  |                 |   |   |   |   |   |                    |  |  |  |                 |   |   |   |   |   |                    |  |  |  |                 |                                                                                                                                                                                                                                                                             |
| 1                  | 2                                                                                                                                                                                                                                                                                                                                                                                                                                                                                                                                                                                                                                                                                                                                                                                                                                                                                                                                                                                                                                                                                                                                                                                                                                                                                                                                                                                                                                                                                                                                                                                                                                                                                                                                                                                                                                                                                                                                                                                                                                                                                                                                                                                                                                                                                                                                                                                                                                                                                                                                                                                                                                                                                                                                                                                                                                                                                                                                                                                                                                                                                                                                                                                                                                                                                                                                                                                                                                                                                                                                                                                                                                                                                                         | 3                                                                              | 4 | 5               |   |   |                    |  |  |  |                 |   |   |   |   |   |                    |  |  |  |                 |   |   |   |   |   |                    |  |  |  |                 |   |   |   |   |   |                    |  |  |  |                 |   |   |   |   |   |                    |  |  |  |                 |   |   |   |   |   |                    |  |  |  |                 |   |   |   |   |   |                    |  |  |  |                 |   |   |   |   |   |                    |  |  |  |                 |                                                                                                                                                                                                                                                                             |
| Total disagreement |                                                                                                                                                                                                                                                                                                                                                                                                                                                                                                                                                                                                                                                                                                                                                                                                                                                                                                                                                                                                                                                                                                                                                                                                                                                                                                                                                                                                                                                                                                                                                                                                                                                                                                                                                                                                                                                                                                                                                                                                                                                                                                                                                                                                                                                                                                                                                                                                                                                                                                                                                                                                                                                                                                                                                                                                                                                                                                                                                                                                                                                                                                                                                                                                                                                                                                                                                                                                                                                                                                                                                                                                                                                                                                           |                                                                                |   | Total agreement |   |   |                    |  |  |  |                 |   |   |   |   |   |                    |  |  |  |                 |   |   |   |   |   |                    |  |  |  |                 |   |   |   |   |   |                    |  |  |  |                 |   |   |   |   |   |                    |  |  |  |                 |   |   |   |   |   |                    |  |  |  |                 |   |   |   |   |   |                    |  |  |  |                 |   |   |   |   |   |                    |  |  |  |                 |                                                                                                                                                                                                                                                                             |
| 1                  | 2                                                                                                                                                                                                                                                                                                                                                                                                                                                                                                                                                                                                                                                                                                                                                                                                                                                                                                                                                                                                                                                                                                                                                                                                                                                                                                                                                                                                                                                                                                                                                                                                                                                                                                                                                                                                                                                                                                                                                                                                                                                                                                                                                                                                                                                                                                                                                                                                                                                                                                                                                                                                                                                                                                                                                                                                                                                                                                                                                                                                                                                                                                                                                                                                                                                                                                                                                                                                                                                                                                                                                                                                                                                                                                         | 3                                                                              | 4 | 5               |   |   |                    |  |  |  |                 |   |   |   |   |   |                    |  |  |  |                 |   |   |   |   |   |                    |  |  |  |                 |   |   |   |   |   |                    |  |  |  |                 |   |   |   |   |   |                    |  |  |  |                 |   |   |   |   |   |                    |  |  |  |                 |   |   |   |   |   |                    |  |  |  |                 |   |   |   |   |   |                    |  |  |  |                 |                                                                                                                                                                                                                                                                             |
| Total disagreement |                                                                                                                                                                                                                                                                                                                                                                                                                                                                                                                                                                                                                                                                                                                                                                                                                                                                                                                                                                                                                                                                                                                                                                                                                                                                                                                                                                                                                                                                                                                                                                                                                                                                                                                                                                                                                                                                                                                                                                                                                                                                                                                                                                                                                                                                                                                                                                                                                                                                                                                                                                                                                                                                                                                                                                                                                                                                                                                                                                                                                                                                                                                                                                                                                                                                                                                                                                                                                                                                                                                                                                                                                                                                                                           |                                                                                |   | Total agreement |   |   |                    |  |  |  |                 |   |   |   |   |   |                    |  |  |  |                 |   |   |   |   |   |                    |  |  |  |                 |   |   |   |   |   |                    |  |  |  |                 |   |   |   |   |   |                    |  |  |  |                 |   |   |   |   |   |                    |  |  |  |                 |   |   |   |   |   |                    |  |  |  |                 |   |   |   |   |   |                    |  |  |  |                 |                                                                                                                                                                                                                                                                             |
| 1                  | 2                                                                                                                                                                                                                                                                                                                                                                                                                                                                                                                                                                                                                                                                                                                                                                                                                                                                                                                                                                                                                                                                                                                                                                                                                                                                                                                                                                                                                                                                                                                                                                                                                                                                                                                                                                                                                                                                                                                                                                                                                                                                                                                                                                                                                                                                                                                                                                                                                                                                                                                                                                                                                                                                                                                                                                                                                                                                                                                                                                                                                                                                                                                                                                                                                                                                                                                                                                                                                                                                                                                                                                                                                                                                                                         | 3                                                                              | 4 | 5               |   |   |                    |  |  |  |                 |   |   |   |   |   |                    |  |  |  |                 |   |   |   |   |   |                    |  |  |  |                 |   |   |   |   |   |                    |  |  |  |                 |   |   |   |   |   |                    |  |  |  |                 |   |   |   |   |   |                    |  |  |  |                 |   |   |   |   |   |                    |  |  |  |                 |   |   |   |   |   |                    |  |  |  |                 |                                                                                                                                                                                                                                                                             |
| Total disagreement |                                                                                                                                                                                                                                                                                                                                                                                                                                                                                                                                                                                                                                                                                                                                                                                                                                                                                                                                                                                                                                                                                                                                                                                                                                                                                                                                                                                                                                                                                                                                                                                                                                                                                                                                                                                                                                                                                                                                                                                                                                                                                                                                                                                                                                                                                                                                                                                                                                                                                                                                                                                                                                                                                                                                                                                                                                                                                                                                                                                                                                                                                                                                                                                                                                                                                                                                                                                                                                                                                                                                                                                                                                                                                                           |                                                                                |   | Total agreement |   |   |                    |  |  |  |                 |   |   |   |   |   |                    |  |  |  |                 |   |   |   |   |   |                    |  |  |  |                 |   |   |   |   |   |                    |  |  |  |                 |   |   |   |   |   |                    |  |  |  |                 |   |   |   |   |   |                    |  |  |  |                 |   |   |   |   |   |                    |  |  |  |                 |   |   |   |   |   |                    |  |  |  |                 |                                                                                                                                                                                                                                                                             |

|                    |                                                                                                                                                                                                                                                                                                                                                                                                                                                                              |                                                                                                                      |     |                 |     |     |                    |                                                                                                                |  |  |                 |                                                                                                                                                                                                                                                                      |
|--------------------|------------------------------------------------------------------------------------------------------------------------------------------------------------------------------------------------------------------------------------------------------------------------------------------------------------------------------------------------------------------------------------------------------------------------------------------------------------------------------|----------------------------------------------------------------------------------------------------------------------|-----|-----------------|-----|-----|--------------------|----------------------------------------------------------------------------------------------------------------|--|--|-----------------|----------------------------------------------------------------------------------------------------------------------------------------------------------------------------------------------------------------------------------------------------------------------|
|                    | <table border="1"> <tr> <td>1</td> <td>2</td> <td>3</td> <td>4</td> <td>5</td> </tr> <tr> <td>Total disagreement</td> <td></td> <td></td> <td></td> <td>Total agreement</td> </tr> </table>                                                                                                                                                                                                                                                                                  | 1                                                                                                                    | 2   | 3               | 4   | 5   | Total disagreement |                                                                                                                |  |  | Total agreement |                                                                                                                                                                                                                                                                      |
| 1                  | 2                                                                                                                                                                                                                                                                                                                                                                                                                                                                            | 3                                                                                                                    | 4   | 5               |     |     |                    |                                                                                                                |  |  |                 |                                                                                                                                                                                                                                                                      |
| Total disagreement |                                                                                                                                                                                                                                                                                                                                                                                                                                                                              |                                                                                                                      |     | Total agreement |     |     |                    |                                                                                                                |  |  |                 |                                                                                                                                                                                                                                                                      |
|                    | <p><b>Pet data</b></p> <p>Criteria: - If you have more than one pet, you must apply the questionnaire to just one animal.</p>                                                                                                                                                                                                                                                                                                                                                |                                                                                                                      |     |                 |     |     |                    |                                                                                                                |  |  |                 |                                                                                                                                                                                                                                                                      |
| <b>33</b>          | Breed (Please chose one of the list)                                                                                                                                                                                                                                                                                                                                                                                                                                         | The owners were provided by the list of dog breeds and the option "other" was also available.                        |     |                 |     |     |                    |                                                                                                                |  |  |                 |                                                                                                                                                                                                                                                                      |
| <b>34</b>          | Age (years)                                                                                                                                                                                                                                                                                                                                                                                                                                                                  |                                                                                                                      |     |                 |     |     |                    |                                                                                                                |  |  |                 |                                                                                                                                                                                                                                                                      |
| <b>35</b>          | Sex <ul style="list-style-type: none"> <li><input type="radio"/> Male</li> <li><input type="radio"/> Female</li> </ul>                                                                                                                                                                                                                                                                                                                                                       |                                                                                                                      |     |                 |     |     |                    |                                                                                                                |  |  |                 |                                                                                                                                                                                                                                                                      |
| <b>36</b>          | Reproductive status <ul style="list-style-type: none"> <li><input type="radio"/> Intact</li> <li><input type="radio"/> Neutered at &lt;6 months</li> <li><input type="radio"/> Neutered at 6-11 months</li> <li><input type="radio"/> Neutered at 1 year</li> <li><input type="radio"/> Neutered at 1-2 years</li> <li><input type="radio"/> Neutered at 2-8 years</li> <li><input type="radio"/> Neutered at &gt;8 years</li> <li><input type="radio"/> Not sure</li> </ul> | For statistical analysis, responses to were grouped to intact, neutered ≤11 months, and neutered >1 year were fused. |     |                 |     |     |                    |                                                                                                                |  |  |                 |                                                                                                                                                                                                                                                                      |
| <b>37</b>          | Weight (kg)                                                                                                                                                                                                                                                                                                                                                                                                                                                                  |                                                                                                                      |     |                 |     |     |                    |                                                                                                                |  |  |                 |                                                                                                                                                                                                                                                                      |
| <b>38</b>          | <p>On the basis of the images below: what score corresponds to your pet?</p> <table border="1"> <tr> <td>1</td> <td>2</td> <td>3</td> <td>4</td> <td>5</td> </tr> <tr> <td>Very thin</td> <td></td> <td></td> <td></td> <td>Obese</td> </tr> </table>                                                                                                                                                                                                                        | 1                                                                                                                    | 2   | 3               | 4   | 5   | Very thin          |                                                                                                                |  |  | Obese           | The body condition chart, available at <a href="http://cavalierhealth.org/images/dog_body_condition_scoring_chart.jpg">http://cavalierhealth.org/images/dog_body_condition_scoring_chart.jpg</a> , was included to help owners to score his/her dogs body condition. |
| 1                  | 2                                                                                                                                                                                                                                                                                                                                                                                                                                                                            | 3                                                                                                                    | 4   | 5               |     |     |                    |                                                                                                                |  |  |                 |                                                                                                                                                                                                                                                                      |
| Very thin          |                                                                                                                                                                                                                                                                                                                                                                                                                                                                              |                                                                                                                      |     | Obese           |     |     |                    |                                                                                                                |  |  |                 |                                                                                                                                                                                                                                                                      |
| <b>39</b>          | <p>Given the image below: what body fat index corresponds to your pet?</p> <table border="1"> <tr> <td>20%</td> <td>30%</td> <td>40%</td> <td>50%</td> <td>60%</td> <td>70%</td> </tr> </table>                                                                                                                                                                                                                                                                              | 20%                                                                                                                  | 30% | 40%             | 50% | 60% | 70%                | The Hill's body fat index (BFI) risk chart, available at <a href="http://www.assaro.c">http://www.assaro.c</a> |  |  |                 |                                                                                                                                                                                                                                                                      |
| 20%                | 30%                                                                                                                                                                                                                                                                                                                                                                                                                                                                          | 40%                                                                                                                  | 50% | 60%             | 70% |     |                    |                                                                                                                |  |  |                 |                                                                                                                                                                                                                                                                      |

|           |                                                                                                                                                                                                                                                                                                                                                                                                                                  |                                                                                                        |
|-----------|----------------------------------------------------------------------------------------------------------------------------------------------------------------------------------------------------------------------------------------------------------------------------------------------------------------------------------------------------------------------------------------------------------------------------------|--------------------------------------------------------------------------------------------------------|
|           |                                                                                                                                                                                                                                                                                                                                                                                                                                  | o.za/uploads/1/0/3/8/10383298/3840090_orig.png, was included to help owners to assess his/her dogs BFI |
| <b>40</b> | Household <ul style="list-style-type: none"> <li><input type="radio"/> Rural zone; the dog spends almost the whole day outside</li> <li><input type="radio"/> Rural zone; the dog spends almost the whole day in the house</li> <li><input type="radio"/> House/apartment without access to garden</li> <li><input type="radio"/> House/apartment with access to garden</li> <li><input type="radio"/> Other</li> </ul>          |                                                                                                        |
| <b>41</b> | Diet <ul style="list-style-type: none"> <li><input type="radio"/> Home-made food</li> <li><input type="radio"/> Food scraps</li> <li><input type="radio"/> Commercial pet food</li> <li><input type="radio"/> Mixed</li> <li><input type="radio"/> Other</li> </ul>                                                                                                                                                              | For statistical analysis, responses “Home-made food” and “Food scraps” were fused                      |
| <b>42</b> | Number of meals per day <ul style="list-style-type: none"> <li><input type="radio"/> 1</li> <li><input type="radio"/> 2</li> <li><input type="radio"/> 3</li> <li><input type="radio"/> &gt; 3</li> </ul>                                                                                                                                                                                                                        |                                                                                                        |
| <b>43</b> | How do you calculate the amount of food for your pet? <ul style="list-style-type: none"> <li><input type="radio"/> Following recommendations provided by a vet</li> <li><input type="radio"/> According to specifications on food packaging</li> <li><input type="radio"/> Dog fed until it stops eating</li> <li><input type="radio"/> A constant food supply is made available</li> <li><input type="radio"/> Other</li> </ul> |                                                                                                        |
| <b>44</b> | Feeding schedule <ul style="list-style-type: none"> <li><input type="radio"/> Fixed (at the same time every day)</li> <li><input type="radio"/> Random</li> <li><input type="radio"/> Other</li> </ul>                                                                                                                                                                                                                           |                                                                                                        |
| <b>45</b> | Do you give your pet food supplements? <ul style="list-style-type: none"> <li><input type="radio"/> Yes</li> <li><input type="radio"/> No</li> </ul>                                                                                                                                                                                                                                                                             |                                                                                                        |
| <b>46</b> | What type of supplement (vitamins, fatty acids, etc.)                                                                                                                                                                                                                                                                                                                                                                            |                                                                                                        |
| <b>47</b> | Do you give your pet food rewards? <ul style="list-style-type: none"> <li><input type="radio"/> Yes</li> <li><input type="radio"/> No</li> </ul>                                                                                                                                                                                                                                                                                 |                                                                                                        |
| <b>48</b> | Physical activity <ul style="list-style-type: none"> <li><input type="radio"/> None</li> <li><input type="radio"/> Walking</li> </ul>                                                                                                                                                                                                                                                                                            |                                                                                                        |

|                               |                                                                                                                                                                                                                                                                                                                                                                                       |   |   |                 |   |   |                    |  |  |  |                 |  |
|-------------------------------|---------------------------------------------------------------------------------------------------------------------------------------------------------------------------------------------------------------------------------------------------------------------------------------------------------------------------------------------------------------------------------------|---|---|-----------------|---|---|--------------------|--|--|--|-----------------|--|
|                               | <ul style="list-style-type: none"> <li><input type="radio"/> Running</li> </ul>                                                                                                                                                                                                                                                                                                       |   |   |                 |   |   |                    |  |  |  |                 |  |
| 49                            | Daily exercise (time) <ul style="list-style-type: none"> <li><input type="radio"/> None</li> <li><input type="radio"/> &lt; 30 min</li> <li><input type="radio"/> 30 min - 1 hour</li> <li><input type="radio"/> &gt; 1 hour</li> <li><input type="radio"/> Other:</li> </ul>                                                                                                         |   |   |                 |   |   |                    |  |  |  |                 |  |
| 50                            | Does your pet suffer from any disease(s)? <ul style="list-style-type: none"> <li><input type="radio"/> No</li> <li><input type="radio"/> Yes</li> </ul>                                                                                                                                                                                                                               |   |   |                 |   |   |                    |  |  |  |                 |  |
| 51                            | What disease?                                                                                                                                                                                                                                                                                                                                                                         |   |   |                 |   |   |                    |  |  |  |                 |  |
| 52                            | What treatment(s) does your pet receive?                                                                                                                                                                                                                                                                                                                                              |   |   |                 |   |   |                    |  |  |  |                 |  |
| 53                            | How many times have you had to take your pet to the vet due to health problems during the last year?                                                                                                                                                                                                                                                                                  |   |   |                 |   |   |                    |  |  |  |                 |  |
| 54                            | My pet gets sick easily? <table border="1" style="margin-left: 40px;"> <tr> <td>1</td> <td>2</td> <td>3</td> <td>4</td> <td>5</td> </tr> <tr> <td>Total disagreement</td> <td></td> <td></td> <td></td> <td>Total agreement</td> </tr> </table>                                                                                                                                       | 1 | 2 | 3               | 4 | 5 | Total disagreement |  |  |  | Total agreement |  |
| 1                             | 2                                                                                                                                                                                                                                                                                                                                                                                     | 3 | 4 | 5               |   |   |                    |  |  |  |                 |  |
| Total disagreement            |                                                                                                                                                                                                                                                                                                                                                                                       |   |   | Total agreement |   |   |                    |  |  |  |                 |  |
| 55                            | Do you believe your pet is happy? <table border="1" style="margin-left: 40px;"> <tr> <td>1</td> <td>2</td> <td>3</td> <td>4</td> <td>5</td> </tr> <tr> <td>Not happy</td> <td></td> <td></td> <td></td> <td>Happy</td> </tr> </table>                                                                                                                                                 | 1 | 2 | 3               | 4 | 5 | Not happy          |  |  |  | Happy           |  |
| 1                             | 2                                                                                                                                                                                                                                                                                                                                                                                     | 3 | 4 | 5               |   |   |                    |  |  |  |                 |  |
| Not happy                     |                                                                                                                                                                                                                                                                                                                                                                                       |   |   | Happy           |   |   |                    |  |  |  |                 |  |
| <b>Owner-pet relationship</b> |                                                                                                                                                                                                                                                                                                                                                                                       |   |   |                 |   |   |                    |  |  |  |                 |  |
| 56                            | Who is responsible for caring for the animal? <ul style="list-style-type: none"> <li><input type="radio"/> The person filling out this questionnaire</li> <li><input type="radio"/> Another member of the household</li> <li><input type="radio"/> Several people</li> <li><input type="radio"/> Other</li> </ul>                                                                     |   |   |                 |   |   |                    |  |  |  |                 |  |
| 57                            | How many other animals live with the pet? <ul style="list-style-type: none"> <li><input type="radio"/> None</li> <li><input type="radio"/> 1</li> <li><input type="radio"/> 2</li> <li><input type="radio"/> 3</li> <li><input type="radio"/> 4</li> <li><input type="radio"/> 5</li> <li><input type="radio"/> &gt; 5</li> </ul>                                                     |   |   |                 |   |   |                    |  |  |  |                 |  |
| 58                            | How long do you spend with your pet each day?<br>You should indicate the active time. Excluding the hours of sleep. <ul style="list-style-type: none"> <li><input type="radio"/> &lt; 2 hours</li> <li><input type="radio"/> 2 - 4 hours</li> <li><input type="radio"/> 4 - 6 hours</li> <li><input type="radio"/> 6 - 8 hours</li> <li><input type="radio"/> &gt; 8 hours</li> </ul> |   |   |                 |   |   |                    |  |  |  |                 |  |
| 59                            | Do you share food with your pet while eating? <table border="1" style="margin-left: 40px;"> <tr> <td>1</td> <td>2</td> <td>3</td> <td>4</td> <td>5</td> </tr> <tr> <td>Never</td> <td></td> <td></td> <td></td> <td>Always</td> </tr> </table>                                                                                                                                        | 1 | 2 | 3               | 4 | 5 | Never              |  |  |  | Always          |  |
| 1                             | 2                                                                                                                                                                                                                                                                                                                                                                                     | 3 | 4 | 5               |   |   |                    |  |  |  |                 |  |
| Never                         |                                                                                                                                                                                                                                                                                                                                                                                       |   |   | Always          |   |   |                    |  |  |  |                 |  |
| 60                            | Are you with your animal while he/she is eating?                                                                                                                                                                                                                                                                                                                                      |   |   |                 |   |   |                    |  |  |  |                 |  |



|       |                                                                                                                                                                                                                                                                                                                                |   |   |        |   |   |       |  |  |  |        |  |
|-------|--------------------------------------------------------------------------------------------------------------------------------------------------------------------------------------------------------------------------------------------------------------------------------------------------------------------------------|---|---|--------|---|---|-------|--|--|--|--------|--|
|       | <table border="1"> <tr> <td>1</td> <td>2</td> <td>3</td> <td>4</td> <td>5</td> </tr> <tr> <td>Never</td> <td></td> <td></td> <td></td> <td>Always</td> </tr> </table>                                                                                                                                                          | 1 | 2 | 3      | 4 | 5 | Never |  |  |  | Always |  |
| 1     | 2                                                                                                                                                                                                                                                                                                                              | 3 | 4 | 5      |   |   |       |  |  |  |        |  |
| Never |                                                                                                                                                                                                                                                                                                                                |   |   | Always |   |   |       |  |  |  |        |  |
| 61    | <p>Do you think that giving treats or gifts to your dog makes him happier?</p> <table border="1"> <tr> <td>1</td> <td>2</td> <td>3</td> <td>4</td> <td>5</td> </tr> <tr> <td>Never</td> <td></td> <td></td> <td></td> <td>Always</td> </tr> </table>                                                                           | 1 | 2 | 3      | 4 | 5 | Never |  |  |  | Always |  |
| 1     | 2                                                                                                                                                                                                                                                                                                                              | 3 | 4 | 5      |   |   |       |  |  |  |        |  |
| Never |                                                                                                                                                                                                                                                                                                                                |   |   | Always |   |   |       |  |  |  |        |  |
| 62    | <p>Do you usually sleep with your pet?</p> <table border="1"> <tr> <td>1</td> <td>2</td> <td>3</td> <td>4</td> <td>5</td> </tr> <tr> <td>Never</td> <td></td> <td></td> <td></td> <td>Always</td> </tr> </table>                                                                                                               | 1 | 2 | 3      | 4 | 5 | Never |  |  |  | Always |  |
| 1     | 2                                                                                                                                                                                                                                                                                                                              | 3 | 4 | 5      |   |   |       |  |  |  |        |  |
| Never |                                                                                                                                                                                                                                                                                                                                |   |   | Always |   |   |       |  |  |  |        |  |
| 63    | <p>Do you consider your pet a member of the family?</p> <ul style="list-style-type: none"> <li><input type="radio"/> Yes</li> <li><input type="radio"/> No</li> </ul>                                                                                                                                                          |   |   |        |   |   |       |  |  |  |        |  |
| 64    | <p>Does taking care of a pet have an influence on your physical activity?</p> <ul style="list-style-type: none"> <li><input type="radio"/> Yes, I do more exercise</li> <li><input type="radio"/> Yes, I do less exercise</li> <li><input type="radio"/> It does not influence the amount of physical activity I do</li> </ul> |   |   |        |   |   |       |  |  |  |        |  |
| 65    | <p>Do you regularly exercise with your pet?</p> <ul style="list-style-type: none"> <li><input type="radio"/> No</li> <li><input type="radio"/> Always</li> <li><input type="radio"/> Sometimes</li> <li><input type="radio"/> Occasionally</li> <li><input type="radio"/> Hardly ever</li> </ul>                               |   |   |        |   |   |       |  |  |  |        |  |
| 66    | What benefits do you attribute to having a pet?                                                                                                                                                                                                                                                                                |   |   |        |   |   |       |  |  |  |        |  |
| 67    | What (if any) problems does your pet cause?                                                                                                                                                                                                                                                                                    |   |   |        |   |   |       |  |  |  |        |  |
|       | <b>Obesity background</b>                                                                                                                                                                                                                                                                                                      |   |   |        |   |   |       |  |  |  |        |  |
| 68    | <p>Do you consider obesity in people a disease?</p> <ul style="list-style-type: none"> <li><input type="radio"/> Yes</li> <li><input type="radio"/> No</li> <li><input type="radio"/> Other</li> </ul>                                                                                                                         |   |   |        |   |   |       |  |  |  |        |  |
| 69    | <p>Do you consider obesity in animals a disease?</p> <ul style="list-style-type: none"> <li><input type="radio"/> Yes</li> <li><input type="radio"/> No</li> <li><input type="radio"/> Other</li> </ul>                                                                                                                        |   |   |        |   |   |       |  |  |  |        |  |
| 70    | <p>Obesity is increasing in society (among both people and pets). What do you think are the three main reasons?</p> <p>1....</p> <p>2....</p> <p>3....</p>                                                                                                                                                                     |   |   |        |   |   |       |  |  |  |        |  |
| 71    | What would you recommend to stop this increase?                                                                                                                                                                                                                                                                                |   |   |        |   |   |       |  |  |  |        |  |
| 72    | Do you think that collaboration between healthcare services and vets could be important for combating obesity? Why?                                                                                                                                                                                                            |   |   |        |   |   |       |  |  |  |        |  |
|       | <b>Satisfaction</b>                                                                                                                                                                                                                                                                                                            |   |   |        |   |   |       |  |  |  |        |  |
| 73    | <p>Difficulty of the survey</p> <table border="1"> <tr> <td>1</td> <td>2</td> <td>3</td> <td>4</td> <td>5</td> </tr> </table>                                                                                                                                                                                                  | 1 | 2 | 3      | 4 | 5 |       |  |  |  |        |  |
| 1     | 2                                                                                                                                                                                                                                                                                                                              | 3 | 4 | 5      |   |   |       |  |  |  |        |  |

|                                           |                                               |      |   |   |      |        |  |  |
|-------------------------------------------|-----------------------------------------------|------|---|---|------|--------|--|--|
|                                           |                                               | Easy |   |   |      | Tricky |  |  |
| <b>74</b>                                 | Length                                        |      |   |   |      |        |  |  |
|                                           | 1                                             | 2    | 3 | 4 | 5    |        |  |  |
|                                           | Short                                         |      |   |   | Long |        |  |  |
| <b>75</b>                                 | Have you found the questionnaire interesting? |      |   |   |      |        |  |  |
|                                           | 1                                             | 2    | 3 | 4 | 5    |        |  |  |
|                                           | No                                            |      |   |   | Yes  |        |  |  |
| <b>Thank you very much for your help!</b> |                                               |      |   |   |      |        |  |  |

## Supplementary Information 2. Detailed descriptive data of the participants and their dogs in each country.

|                                                                                                                                                | Croatia                                                                                                                   | Denmark                                                                                                         | Italy                                                                                                                                                          | Lithuania                                                                                                               | Poland                                                                                                     | Portugal                                                                                                                       | Romania                                                                                                                   | Serbia                                                                                                      | Spain                                                                                                 | Sweden                                                                                                            |
|------------------------------------------------------------------------------------------------------------------------------------------------|---------------------------------------------------------------------------------------------------------------------------|-----------------------------------------------------------------------------------------------------------------|----------------------------------------------------------------------------------------------------------------------------------------------------------------|-------------------------------------------------------------------------------------------------------------------------|------------------------------------------------------------------------------------------------------------|--------------------------------------------------------------------------------------------------------------------------------|---------------------------------------------------------------------------------------------------------------------------|-------------------------------------------------------------------------------------------------------------|-------------------------------------------------------------------------------------------------------|-------------------------------------------------------------------------------------------------------------------|
| <b>Total number of responses obtained</b>                                                                                                      | <b>233</b>                                                                                                                | <b>541</b>                                                                                                      | <b>126</b>                                                                                                                                                     | <b>260</b>                                                                                                              | <b>406</b>                                                                                                 | <b>298</b>                                                                                                                     | <b>218</b>                                                                                                                | <b>160</b>                                                                                                  | <b>208</b>                                                                                            | <b>735</b>                                                                                                        |
| <b>The questionnaire dissemination ways (%)</b>                                                                                                |                                                                                                                           |                                                                                                                 |                                                                                                                                                                |                                                                                                                         |                                                                                                            |                                                                                                                                |                                                                                                                           |                                                                                                             |                                                                                                       |                                                                                                                   |
| Through a researcher involved in the study                                                                                                     | 13,7                                                                                                                      | 2,8                                                                                                             | 11,1                                                                                                                                                           | 37,7                                                                                                                    | 28,1                                                                                                       | 40,3                                                                                                                           | 10,7                                                                                                                      | 23,8                                                                                                        | 18,8                                                                                                  | 0,4                                                                                                               |
| Through the veterinary clinic I go to with my pet                                                                                              | 18,0                                                                                                                      | 7,4                                                                                                             | 37,3                                                                                                                                                           | 1,5                                                                                                                     | 19,5                                                                                                       | 1,0                                                                                                                            | 4,6                                                                                                                       | 1,9                                                                                                         | 31,3                                                                                                  | 0,1                                                                                                               |
| Through somebody else who went to a veterinary clinic                                                                                          | 3,9                                                                                                                       | 0,7                                                                                                             | 0,8                                                                                                                                                            | 1,2                                                                                                                     | 2,0                                                                                                        | 0,0                                                                                                                            | 0,9                                                                                                                       | 0,0                                                                                                         | 1,4                                                                                                   | 0,0                                                                                                               |
| Through a dog activity or dog breeding organisation                                                                                            | 1,3                                                                                                                       | 1,1                                                                                                             | 0,0                                                                                                                                                            | 0,0                                                                                                                     | 0,0                                                                                                        | 0,7                                                                                                                            | 0,6                                                                                                                       | 0,0                                                                                                         | 0,5                                                                                                   | 0,3                                                                                                               |
| Through a colleague                                                                                                                            | 26,6                                                                                                                      | 1,8                                                                                                             | 28,6                                                                                                                                                           | 10,0                                                                                                                    | 7,9                                                                                                        | 11,4                                                                                                                           | 4,6                                                                                                                       | 0,2                                                                                                         | 8,2                                                                                                   | 2,4                                                                                                               |
| Through a friend or family member                                                                                                              | 15,5                                                                                                                      | 4,8                                                                                                             | 21,4                                                                                                                                                           | 7,3                                                                                                                     | 9,6                                                                                                        | 14,4                                                                                                                           | 3,2                                                                                                                       | 26,3                                                                                                        | 21,2                                                                                                  | 2,9                                                                                                               |
| Through social media (e.g. Facebook, Twitter)                                                                                                  | 19,3                                                                                                                      | 80,8                                                                                                            | 0,8                                                                                                                                                            | 36,2                                                                                                                    | 30,0                                                                                                       | 32,2                                                                                                                           | 74,8                                                                                                                      | 28,1                                                                                                        | 18,8                                                                                                  | 93,7                                                                                                              |
| Other                                                                                                                                          | 1,7                                                                                                                       | 0,6                                                                                                             | 0,0                                                                                                                                                            | 6,2                                                                                                                     | 3,0                                                                                                        | 0,0                                                                                                                            | 0,5                                                                                                                       | 0,0                                                                                                         | 0,0                                                                                                   | 0,1                                                                                                               |
| <b>Owner Data</b>                                                                                                                              |                                                                                                                           |                                                                                                                 |                                                                                                                                                                |                                                                                                                         |                                                                                                            |                                                                                                                                |                                                                                                                           |                                                                                                             |                                                                                                       |                                                                                                                   |
| <b>Man/Woman</b>                                                                                                                               | 59 (25,3%)/ 174 (74,7%)                                                                                                   | 49 (9,1%)/ 492 (90,9%)                                                                                          | 35 (28%)/ 91 (72%)                                                                                                                                             | 48 (18,5%)/212 (81,5%)                                                                                                  | 67 (16,5%)/ 339 (83,5%)                                                                                    | 50 (16,8%)/248 (83,2%)                                                                                                         | 39 (17,9%)/179 (82,1%)                                                                                                    | 42 (26,3%)/ 118 (73,7%)                                                                                     | 58 (27,9%)/ 150 (72,1%)                                                                               | 38 (5,2%)/697 (94,8%)                                                                                             |
| <b>Age, years</b>                                                                                                                              | 18 - 73 (n=233)                                                                                                           | 18 - 84 (n=541)                                                                                                 | 19 - 80 (n=126)                                                                                                                                                | 18 - 80 (n=260)                                                                                                         | 18 - 72 (n=406)                                                                                            | 18 - 72 (n=298)                                                                                                                | 18 - 68 (n=218)                                                                                                           | 18 - 72 (n=160)                                                                                             | 18 - 63 (n=208)                                                                                       | 18 - 98 (n=735)                                                                                                   |
| <b>Number of family members living with pet</b>                                                                                                | 3 (1-7)                                                                                                                   | 2 (1-7)                                                                                                         | 3 (1 - 6)                                                                                                                                                      | 3 (1-8)                                                                                                                 | 3 (1 - 8)                                                                                                  | 3 (1 - 8)                                                                                                                      | 3 (1-10)                                                                                                                  | 3 (1 - 7)                                                                                                   | 3 (1-6)                                                                                               | 2 (1-7)                                                                                                           |
| <b>Educational level of person responding to questionnaire</b>                                                                                 |                                                                                                                           |                                                                                                                 |                                                                                                                                                                |                                                                                                                         |                                                                                                            |                                                                                                                                |                                                                                                                           |                                                                                                             |                                                                                                       |                                                                                                                   |
| o Primary                                                                                                                                      | 0                                                                                                                         | 30 (5,5%)                                                                                                       | 0                                                                                                                                                              | 1 (0,4%)                                                                                                                | 5 (1,2%)                                                                                                   | 2 (0,7%)                                                                                                                       | 26 (11,9%)                                                                                                                | 0                                                                                                           | 7 (3,4%)                                                                                              | 25 (3,4%)                                                                                                         |
| o Secondary/High School                                                                                                                        | 77 (33,0%)                                                                                                                | 45 (8,3%)                                                                                                       | 29 (23,0%)                                                                                                                                                     | 71 (27,3%)                                                                                                              | 160 (39,4%)                                                                                                | 45 (15,1%)                                                                                                                     | 2 (0,9%)                                                                                                                  | 38 (23,8%)                                                                                                  | 11 (5,3%)                                                                                             | 191 (36,0%)                                                                                                       |
| o Vocational training                                                                                                                          | 11 (4,7%)                                                                                                                 | 184 (34,0%)                                                                                                     | 17 (13,5%)                                                                                                                                                     | 14 (5,4%)                                                                                                               | 16 (3,9%)                                                                                                  | 2 (0,7%)                                                                                                                       | 1 (0,5%)                                                                                                                  | 6 (3,8%)                                                                                                    | 60 (28,8%)                                                                                            | 102 (13,9%)                                                                                                       |
| o University degree                                                                                                                            | 108 (46,4%)                                                                                                               | 169 (31,2%)                                                                                                     | 65 (51,6%)                                                                                                                                                     | 135 (51,9%)                                                                                                             | 212 (52,2%)                                                                                                | 185 (62,1%)                                                                                                                    | 132 (60,6%)                                                                                                               | 80 (50,0%)                                                                                                  | 94 (45,2%)                                                                                            | 403 (54,8%)                                                                                                       |
| o Postgraduate qualifications                                                                                                                  | 35 (15,0%)                                                                                                                | 58 (10,7%)                                                                                                      | 13 (10,3%)                                                                                                                                                     | 34 (13,1%)                                                                                                              | 12 (3,0%)                                                                                                  | 63 (21,1%)                                                                                                                     | 57 (26,1%)                                                                                                                | 36 (22,5%)                                                                                                  | 35 (23,3%)                                                                                            | 13 (1,8%)                                                                                                         |
| o Other:                                                                                                                                       | 2 (0,9%)                                                                                                                  | 55 (10,2%)                                                                                                      | 2 (1,6%)                                                                                                                                                       | 6 (2,3%)                                                                                                                | 1 (0,2%)                                                                                                   | 1 (0,3%)                                                                                                                       | -                                                                                                                         | 0                                                                                                           | 1 (0,5%)                                                                                              | 1 (0,1%)                                                                                                          |
| <b>Employment *</b>                                                                                                                            |                                                                                                                           |                                                                                                                 |                                                                                                                                                                |                                                                                                                         |                                                                                                            |                                                                                                                                |                                                                                                                           |                                                                                                             |                                                                                                       |                                                                                                                   |
| o Student                                                                                                                                      | 22 (9,4%)                                                                                                                 | 74 (13,7%)                                                                                                      | 8 (6,3%)                                                                                                                                                       | 109 (41,9%)                                                                                                             | 181 (44,6%)                                                                                                | 104 (34,9%)                                                                                                                    | 51 (23,4%)                                                                                                                | 29 (18,1%)                                                                                                  | 14 (9,3%)                                                                                             | 120 (16,3%)                                                                                                       |
| o Employed                                                                                                                                     | 177 (76,0%)                                                                                                               | 364 (67,3%)                                                                                                     | 100 (79,4)                                                                                                                                                     | 131 (50,4%)                                                                                                             | 187 (46,1%)                                                                                                | 171 (57,4%)                                                                                                                    | 147 (67,4%)                                                                                                               | 110 (68,8%)                                                                                                 | 162 (77,9%)                                                                                           | 480 (65,3%)                                                                                                       |
| o Retired                                                                                                                                      | 13 (5,6%)                                                                                                                 | 62 (11,5%)                                                                                                      | 5 (3,9%)                                                                                                                                                       | 5 (1,9%)                                                                                                                | 8 (2,7%)                                                                                                   | 8 (2,7%)                                                                                                                       | 8 (2,7%)                                                                                                                  | 7 (4,4%)                                                                                                    | 0                                                                                                     | 71 (9,7%)                                                                                                         |
| o Unemployed                                                                                                                                   | 16 (6,9%)                                                                                                                 | 41 (7,6%)                                                                                                       | 8 (6,3%)                                                                                                                                                       | 4 (1,5%)                                                                                                                | 28 (6,9%)                                                                                                  | 15 (5,0%)                                                                                                                      | 9 (4,1%)                                                                                                                  | 14 (8,8%)                                                                                                   | 32 (15,4%)                                                                                            | 29 (3,9%)                                                                                                         |
| o Other:                                                                                                                                       | 5 (2,1%)                                                                                                                  | 0                                                                                                               | 0                                                                                                                                                              | 11 (4,2%)                                                                                                               | 0                                                                                                          | 0                                                                                                                              | 0                                                                                                                         | 0                                                                                                           | 0                                                                                                     | 35 (4,8%)                                                                                                         |
| <b>Monthly Family income *</b>                                                                                                                 |                                                                                                                           |                                                                                                                 |                                                                                                                                                                |                                                                                                                         |                                                                                                            |                                                                                                                                |                                                                                                                           |                                                                                                             |                                                                                                       |                                                                                                                   |
| o =< national minimum wage (MW)                                                                                                                | 39 (16,7%)                                                                                                                | 32 (5,9%)                                                                                                       | 17 (13,5%)                                                                                                                                                     | 21 (8,1%)                                                                                                               | 83 (20,4%)                                                                                                 | 79 (26,5%)                                                                                                                     | 5 (2,3%)                                                                                                                  | 35 (21,9%)                                                                                                  | 28 (13,5%)                                                                                            | 115 (15,6%)                                                                                                       |
| o 1 – 2 MW                                                                                                                                     | 0                                                                                                                         | 81 (15,0%)                                                                                                      | 46 (36,5%)                                                                                                                                                     | 61 (23,5%)                                                                                                              | 91 (22,4%)                                                                                                 | 108 (36,2%)                                                                                                                    | 25 (11,5%)                                                                                                                | 53 (33,1%)                                                                                                  | 54 (26,0%)                                                                                            | 222 (30,2%)                                                                                                       |
| o 2 – 3 MW                                                                                                                                     | 94 (40,3%)                                                                                                                | 98 (18,1%)                                                                                                      | 36 (28,6%)                                                                                                                                                     | 58 (22,3%)                                                                                                              | 86 (21,2%)                                                                                                 | 72 (24,2%)                                                                                                                     | 2 (0,9%)                                                                                                                  | 47 (29,4%)                                                                                                  | 49 (23,6%)                                                                                            | 219 (29,8%)                                                                                                       |
| o 3 – 4 MW                                                                                                                                     | 82 (35,2%)                                                                                                                | 202 (37,3%)                                                                                                     | 8 (6,3%)                                                                                                                                                       | 49 (18,8%)                                                                                                              | 75 (18,5%)                                                                                                 | 1 (0,3%)                                                                                                                       | 109 (50,0%)                                                                                                               | 16 (10,0%)                                                                                                  | 32 (15,4%)                                                                                            | 107 (14,6%)                                                                                                       |
| o => 4 MW                                                                                                                                      | 18 (7,7%)                                                                                                                 | 128 (23,7%)                                                                                                     | 19 (15,1%)                                                                                                                                                     | 71 (27,3%)                                                                                                              | 71 (17,5%)                                                                                                 | 38 (12,8%)                                                                                                                     | 77 (35,3%)                                                                                                                | 9 (5,6%)                                                                                                    | 45 (21,6%)                                                                                            | 72 (9,8%)                                                                                                         |
| <b>During the past 30 days (1 month) on how many days did you smoke?</b>                                                                       |                                                                                                                           |                                                                                                                 |                                                                                                                                                                |                                                                                                                         |                                                                                                            |                                                                                                                                |                                                                                                                           |                                                                                                             |                                                                                                       |                                                                                                                   |
| o Every day or almost every day                                                                                                                | 76 (32,6%)                                                                                                                | 96 (17,7%)                                                                                                      | 31 (24,6%)                                                                                                                                                     | 50 (19,2%)                                                                                                              | 95 (23,4%)                                                                                                 | 49 (16,4%)                                                                                                                     | 78 (35,8%)                                                                                                                | 50 (31,3%)                                                                                                  | 29 (13,9%)                                                                                            | 98 (13,3%)                                                                                                        |
| o Some days                                                                                                                                    | 10 (4,3%)                                                                                                                 | 19 (3,5%)                                                                                                       | 12 (9,5%)                                                                                                                                                      | 20 (7,7%)                                                                                                               | 9 (2,2%)                                                                                                   | 25 (8,4%)                                                                                                                      | 10 (4,6%)                                                                                                                 | 10 (6,3%)                                                                                                   | 14 (6,7%)                                                                                             | 30 (4,1%)                                                                                                         |
| o Not smoker                                                                                                                                   | 147 (63,1%)                                                                                                               | 426 (78,7%)                                                                                                     | 83 (65,9%)                                                                                                                                                     | 190 (73,1%)                                                                                                             | 302 (74,4%)                                                                                                | 224 (75,2%)                                                                                                                    | 130 (59,6%)                                                                                                               | 100 (62,5%)                                                                                                 | 165 (79,3%)                                                                                           | 607 (82,6%)                                                                                                       |
| <b>Disease, Yes/No</b>                                                                                                                         | 64 (27,5)/ 169 (72,5%)                                                                                                    | 202 (37,3%)/ 339 (62,7%)                                                                                        | 32 (25,4%)/ 94 (74,6%)                                                                                                                                         | 56 (21,5%)/204 (78,5%)                                                                                                  | 110 (27,1%)/ 296 (72,9%)                                                                                   | 74 (24,8%)/ 224 (75,2%)                                                                                                        | 44 (20,2%)/ 174 (79,8%)                                                                                                   | 30 (18,8%)/ 130 (81,2%)                                                                                     | 49 (23,6%)/ 159 (76,4%)                                                                               | 218 (29,7%)/517(70,3%)                                                                                            |
| <b>Treatment, Yes/No</b>                                                                                                                       | 56 (24,0%)/ 177 (76,0%)                                                                                                   | 167 (30,9%)/ 374 (69,1%)                                                                                        | 35 (27,8%)/ 91 (72,2%)                                                                                                                                         | 46 (17,7%)/214 (82,3%)                                                                                                  | 40 (10,0%)/ 366 (60,0%)                                                                                    | 61 (20,5%)/ 237 (79,5%)                                                                                                        | 28 (12,8%)/190 (87,2%)                                                                                                    | 26 (16,3%)/ 134 (83,7%)                                                                                     | 39 (18,8%)/ 169 (81,2%)                                                                               | 176 (23,9%)/559 (76,1%)                                                                                           |
| <b>Dog Data</b>                                                                                                                                |                                                                                                                           |                                                                                                                 |                                                                                                                                                                |                                                                                                                         |                                                                                                            |                                                                                                                                |                                                                                                                           |                                                                                                             |                                                                                                       |                                                                                                                   |
| <b>Age, years</b>                                                                                                                              | 0,0 - 15,0 (n=233)                                                                                                        | 0,0 - 22,0 (n=539)                                                                                              | 0,3 - 16,0 (n=126)                                                                                                                                             | 0,1 - 15,0 (n=260)                                                                                                      | 0,3 - 16,0 (n=406)                                                                                         | 0,0 - 22,0 (n=298)                                                                                                             | 0,3 - 16 (n=216)                                                                                                          | 0,1 - 17,0 (n=160)                                                                                          | 0,1 - 16,0 (n=208)                                                                                    | 0,1 - 15                                                                                                          |
| <b>Sex, Female/Male</b>                                                                                                                        | 124 (53,2%)/ 109 (46,8%)                                                                                                  | 266 (49,2%)/ 275 (50,8%)                                                                                        | 65 (51,6%)/ 61 (48,4%)                                                                                                                                         | 128 (49,2%)/132 (50,8%)                                                                                                 | 224 (55,2%)/ 182 (44,8%)                                                                                   | 148 (49,7%)/ 150 (50,3%)                                                                                                       | 85 (39,0%)/ 133 (61,0%)                                                                                                   | 81 (50,6%)/ 79 (49,4%)                                                                                      | 114 (54,8%)/ 94 (45,2%)                                                                               | 383 (52.1%)/352 (47,9%)                                                                                           |
| <b>Breed</b> (5 breeds most repeated, with the exception of mixed breed/mongrel dogs, that were the most popular in all the studied countries) | Maltese (n=40), German Shepherd (n=8), Staffordshire Bull Terrier (n=8), Golden Retriever (n=7), Labrador Retriever (n=7) | Labrador Retriever (n=65), Golden Retriever (n=34), German shepherd (n=23), Border Collie (n=21), Poodle (n=17) | German Shepherd (n=7), Labrador Retriever (n=6), Pinscher (n=5), Cocker Spaniel (n=4), Border Collie (n=3), French Bulldog (n=3), Doberman (n=3), Jack Russell | German shepherd (n=13), Yorkshire terrier (n=10), Belgian Shepherd (n=8), Labrador Retriever (n=8), and Dachshund (n=8) | German Shepherd (n=24), Labrador Retriever (n=19), Schnauzer (n=16), Briard (n=12), Golden Retriever (n=8) | Labrador Retriever (n=32), German shepherd (n=10), Golden Retriever (n=8), Jack Russell Terrier (n=8), Yorkshire terrier (n=7) | Labrador Retriever (n=13), German shepherd (n=11), Golden Retriever (n=10), Yorkshire terrier (n=7), Siberian Husky (n=5) | Labrador Retriever (n=12), Yorkshire Terrier (n=6), Maltese (n=6), Rottweiler (n=6), Golden Retriever (n=6) | Labrador Retriever (n=10), Golden Retriever (n=7), Bodegero andaluz (n=7), Boxer (n=6), Podenco (n=6) | Labrador Retrieves (n=79), Pug (n=40), Deutscher Schäferhund (29), Border Collie (n=27), Golden retriever (n=21). |
| <b>Reproductive status:</b>                                                                                                                    |                                                                                                                           |                                                                                                                 |                                                                                                                                                                |                                                                                                                         |                                                                                                            |                                                                                                                                |                                                                                                                           |                                                                                                             |                                                                                                       |                                                                                                                   |
| o Intact                                                                                                                                       | 131 (56,2%)                                                                                                               | 329 (60,8%)                                                                                                     | 61 (48,4%)                                                                                                                                                     | 181 (69,6%)                                                                                                             | 197 (48,5%)                                                                                                | 155 (52,0%)                                                                                                                    | 123 (56,4%)                                                                                                               | 108 (67,5%)                                                                                                 | 75 (36,1%)                                                                                            | 506 (68,8%)                                                                                                       |
| o Neutered at <6 months                                                                                                                        | 17 (7,3%)                                                                                                                 | 16 (3,0%)                                                                                                       | 11 (8,7%)                                                                                                                                                      | 6 (2,3%)                                                                                                                | 19 (4,7%)                                                                                                  | 22 (7,4%)                                                                                                                      | 11 (5,0%)                                                                                                                 | 4 (2,5%)                                                                                                    | 17 (8,2%)                                                                                             | 7 (1,0%)                                                                                                          |
| o Neutered at 6-11 months                                                                                                                      | 20 (8,6%)                                                                                                                 | 18 (3,3%)                                                                                                       | 24 (19,0%)                                                                                                                                                     | 23 (8,8%)                                                                                                               | 34 (8,4%)                                                                                                  | 36 (12,1%)                                                                                                                     | 15 (6,9%)                                                                                                                 | 6 (3,8%)                                                                                                    | 36 (17,3%)                                                                                            | 54 (7,3%)                                                                                                         |
| o Neutered at 1 year                                                                                                                           | 10 (4,3%)                                                                                                                 | 17 (3,1%)                                                                                                       | 7 (5,6%)                                                                                                                                                       | 7 (2,7%)                                                                                                                | 27 (6,7%)                                                                                                  | 13 (4,4%)                                                                                                                      | 9 (4,1%)                                                                                                                  | 5 (3,1%)                                                                                                    | 0                                                                                                     | 0 (0%)                                                                                                            |
| o Neutered at 1-2 years                                                                                                                        | 12 (5,2%)                                                                                                                 | 30 (5,5%)                                                                                                       | 9 (7,1%)                                                                                                                                                       | 11 (4,2%)                                                                                                               | 46 (11,3%)                                                                                                 | 16 (5,4%)                                                                                                                      | 16 (7,3%)                                                                                                                 | 12 (7,5%)                                                                                                   | 32 (15,4%)                                                                                            | 70 (9,5%)                                                                                                         |
| o Neutered at 2-8 years                                                                                                                        | 32 (13,7%)                                                                                                                | 102 (18,9%)                                                                                                     | 8 (6,3%)                                                                                                                                                       | 24 (9,2%)                                                                                                               | 64 (15,8%)                                                                                                 | 36 (12,1%)                                                                                                                     | 36 (16,5%)                                                                                                                | 18 (11,3%)                                                                                                  | 36 (17,3%)                                                                                            | 85 (11,6%)                                                                                                        |
| o Neutered at >8 years                                                                                                                         | 11 (4,7%)                                                                                                                 | 27 (5,0%)                                                                                                       | 6 (4,8%)                                                                                                                                                       | 5 (1,9%)                                                                                                                | 16 (3,9%)                                                                                                  | 14 (4,7%)                                                                                                                      | 4 (1,8%)                                                                                                                  | 4 (2,5%)                                                                                                    | 11 (5,3%)                                                                                             | 11 (1,5%)                                                                                                         |
| o Not sure                                                                                                                                     | 0                                                                                                                         | 2 (0,4%)                                                                                                        | 0                                                                                                                                                              | 3 (1,2%)                                                                                                                | 3 (0,7%)                                                                                                   | 6 (2,0%)                                                                                                                       | 4 (1,8%)                                                                                                                  | 3 (1,9%)                                                                                                    | 1 (0,5%)                                                                                              | 2 (0,3%)                                                                                                          |
| <b>Disease, Yes/No</b>                                                                                                                         | 28 (12,0%)/ 205 (88,0%)                                                                                                   | 122 (22,6%)/ 419 (77,4%)                                                                                        | 43 (34,1%)/ 83 (65,9%)                                                                                                                                         | 47 (18,1%)/ 213 (81,9%)                                                                                                 | 97 (23,9%)/ 309 (76,1%)                                                                                    | 53 (17,8%)/ 245 (82,2%)                                                                                                        | 26 (11,9%)/ 192 (88,1%)                                                                                                   | 25 (15,6%)/ 135 (84,4%)                                                                                     | 50 (24,0%)/ 158 (76%)                                                                                 | 126 (17.1%)/609 (82,9%)                                                                                           |
| <b>Treatment, Yes/No</b>                                                                                                                       | 19 (8,2%)/ 214 (91,8%)                                                                                                    | 94 (17,4%)/ 447 (82,6%)                                                                                         | 34 (27,0%)/ 92 (73,0%)                                                                                                                                         | 29 (11,2%)/ 231 (88,8%)                                                                                                 | 85 (20,9%)/ 321 (79,1%)                                                                                    | 48 (16,1%)/ 250 (83,9%)                                                                                                        | 21 (9,6%)/ 197 (90,4%)                                                                                                    | 21 (13,1%)/ 139 (86,9%)                                                                                     | 43 (20,7%)/ 165 (79,3%)                                                                               | 116 (15,8%)/619 (84,2)                                                                                            |
| <b>Visits to vet during last year, because of health problems</b>                                                                              | 0-10                                                                                                                      | 0-15                                                                                                            | 0 - 24                                                                                                                                                         | 0 - 10                                                                                                                  | 0-50                                                                                                       | 0-48                                                                                                                           | 0-48                                                                                                                      | 0 - 24                                                                                                      | 0-14                                                                                                  | 0 - 25                                                                                                            |

**Supplementary Information 3.** Prevalence of obesity based on BCS categories cross tabulated with BFI categories [Total (Percent)].

| BCS categories       | BFI categories            |                           | Total (percent) |
|----------------------|---------------------------|---------------------------|-----------------|
|                      | Normal weight,<br>BFI 20% | Overweight,<br>BFI 30-70% |                 |
| Underweight, BCS 1-2 | N = 369 (11.8%)           | N = 84 (2.7%)             | 453 (14.5%)     |
| Normal weight, BCS 3 | N = 1139 (36.5%)          | N = 939 (30.1%)           | 2078 (66.6%)    |
| Overweight, BCS 4-5  | N = 32 (1.1%)             | N = 556 (17.8%)           | 588(18.9%)      |
| <b>Total</b>         | N = 1540 (49.9%)          | N = 1579 (50.6%)          | 3119 (100.0%)   |

Chi-squared test,  $\chi^2(2) = 665,14, p < 0,001$
